# Supplementary material for: Significant transcriptional changes in 15q duplication but not Angelman syndrome deletion stem cell-derived neurons
Source: Springer Nature journal article supplement (doi:10.1186/s13229-018-0191-y), 2018-01-27
Supplement: MOESM2 [file 15419274]

Figure S1

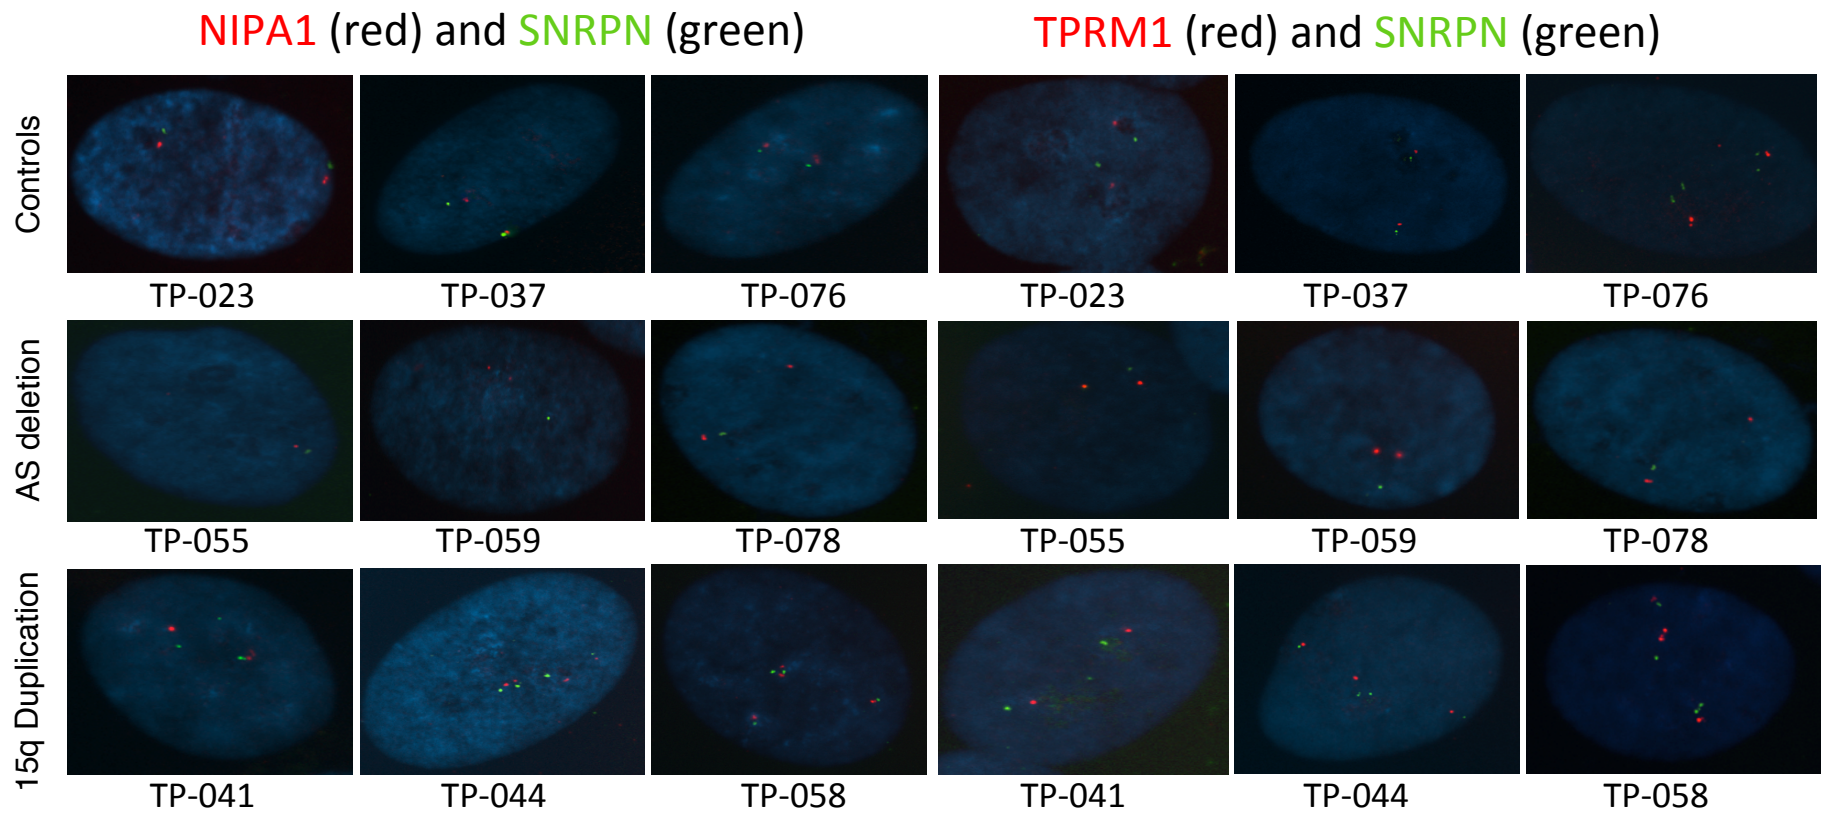

Figure S2

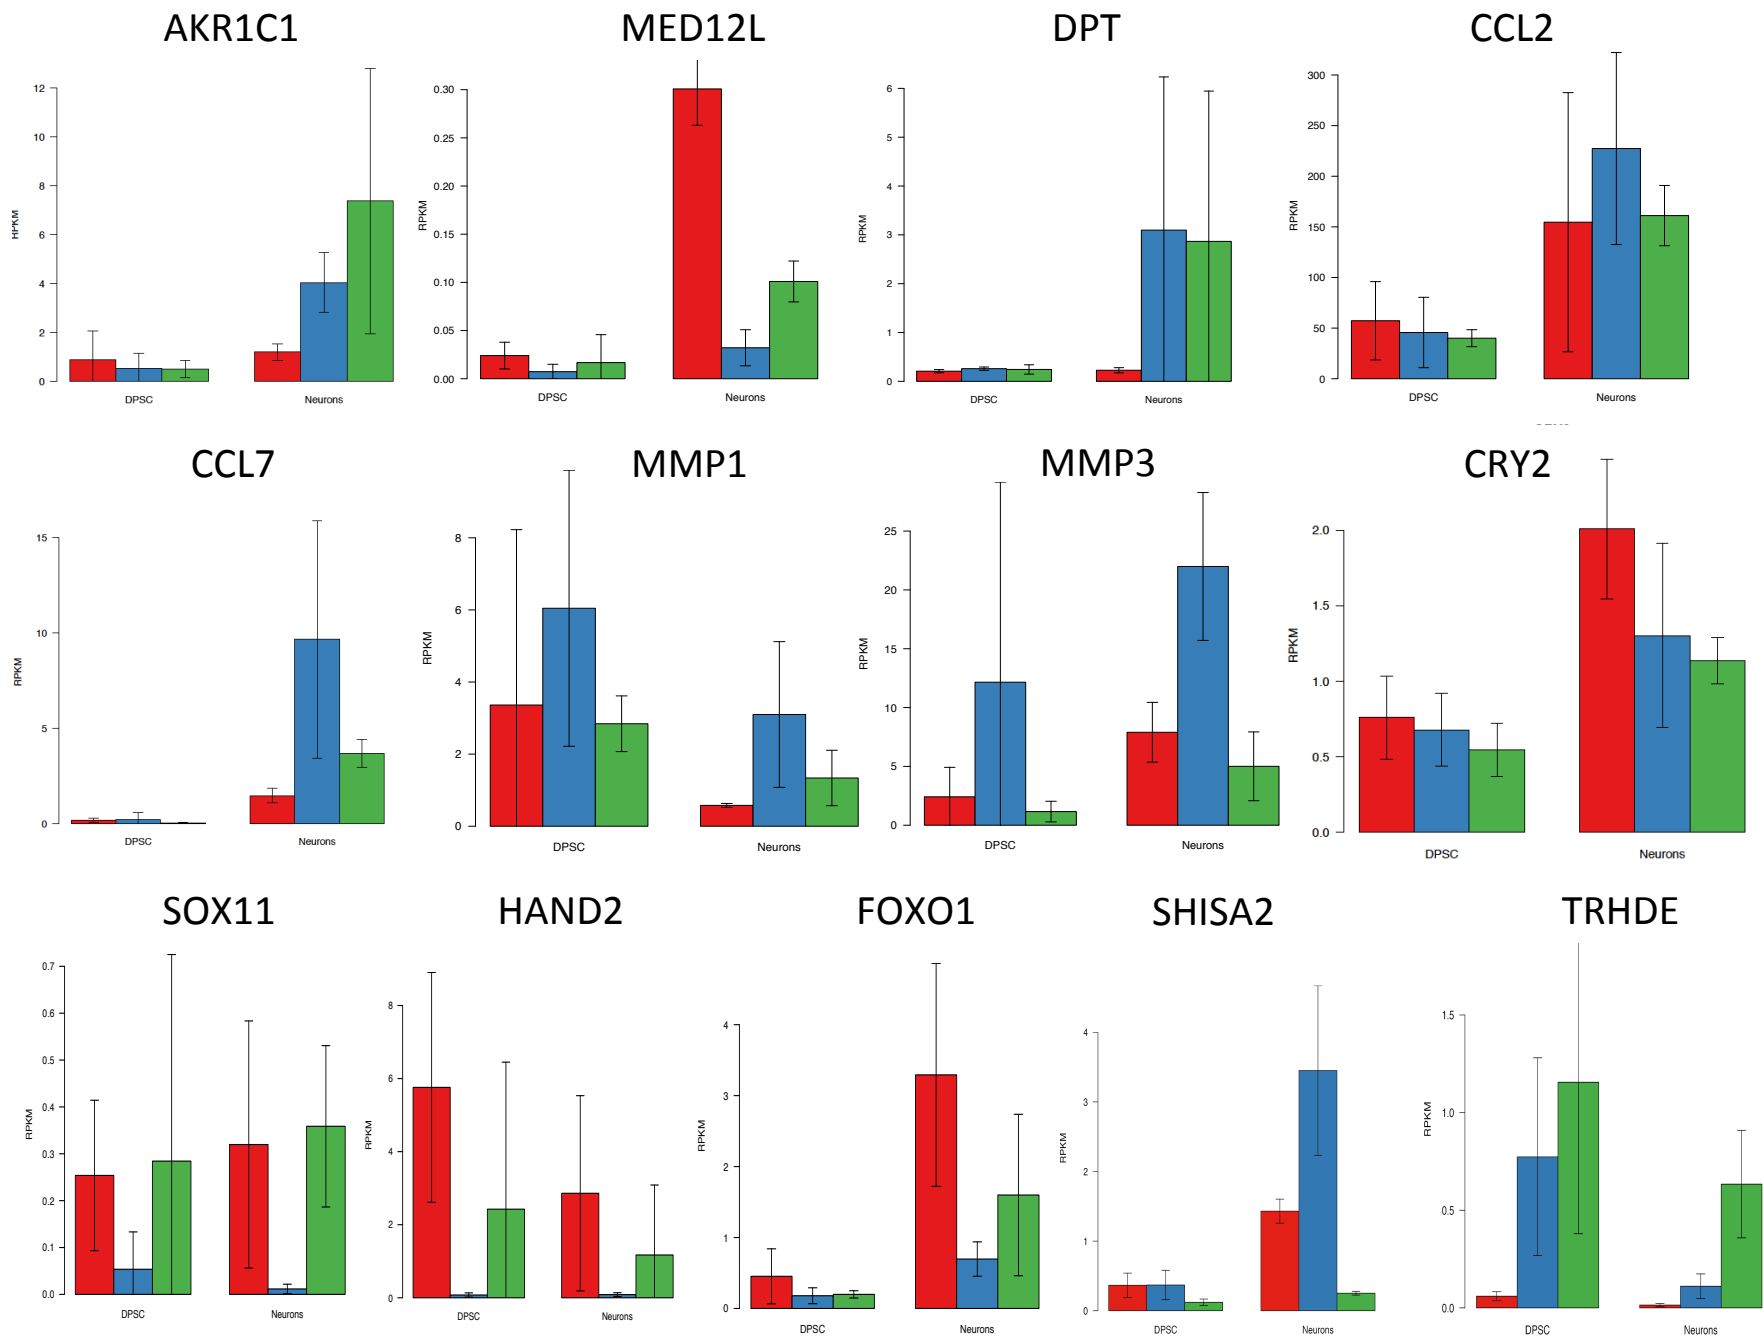

**Figure S3**

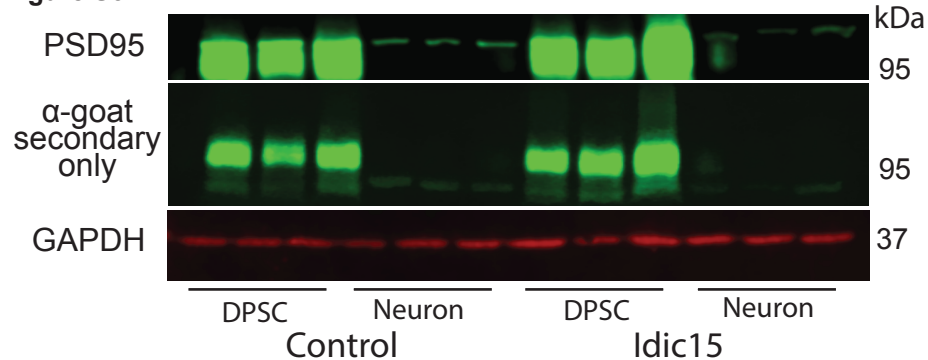

TRANSFAC: 15q Duplication Neurons

**DOWN**

| NAME                    | SIZE | ES  | NES        | NOM p-val  | FDR q-val  | FWER p-val |       |
|-------------------------|------|-----|------------|------------|------------|------------|-------|
| GCGSCMNTTT_UNKNOWN      |      | 64  | -0.5094314 | -1.8933098 | 0          | 0.02501921 | 0.017 |
| V\$OCT1_06              |      | 226 | -0.3933881 | -1.7968041 | 0          | 0.02733338 | 0.035 |
| V\$NKX61_01             |      | 198 | -0.3649626 | -1.6230397 | 0          | 0.13079427 | 0.23  |
| V\$EN1_01               |      | 98  | -0.4000299 | -1.5965902 | 0.00420168 | 0.13397652 | 0.301 |
| V\$CEBP_Q3              |      | 223 | -0.3518449 | -1.5878625 | 0          | 0.11962409 | 0.331 |
| V\$HP1SITEFACTOR_Q6     |      | 208 | -0.3452416 | -1.5349915 | 0.0021645  | 0.18466899 | 0.516 |
| V\$MYOGNF1_01           |      | 39  | -0.4300448 | -1.4831299 | 0.02626263 | 0.27976456 | 0.743 |
| V\$GATA1_01             |      | 221 | -0.322842  | -1.4529176 | 0          | 0.33564568 | 0.85  |
| V\$SOX9_B1              |      | 217 | -0.3191878 | -1.4236258 | 0.0046729  | 0.41007605 | 0.934 |
| V\$SREBP_Q3             |      | 218 | -0.3090884 | -1.4095014 | 0.00888889 | 0.43028527 | 0.96  |
| V\$OCT1_07              |      | 141 | -0.3329824 | -1.4077808 | 0.01545254 | 0.39733857 | 0.96  |
| YGCANTGCR_UNKNOWN       |      | 119 | -0.3381355 | -1.4044033 | 0.02118644 | 0.380837   | 0.968 |
| V\$DR3_Q4               |      | 124 | -0.3318088 | -1.3932549 | 0.01476793 | 0.39827082 | 0.981 |
| MYAATNNNNNNNGGC_UNKNOWN |      | 99  | -0.3469147 | -1.3911699 | 0.02296451 | 0.3774542  | 0.983 |
| V\$VDR_Q3               |      | 192 | -0.3127211 | -1.3895535 | 0.00445434 | 0.35847512 | 0.985 |
| V\$SRY_02               |      | 229 | -0.3060061 | -1.3804193 | 0.01106195 | 0.37415162 | 0.992 |
| V\$AP3_Q6               |      | 217 | -0.3025683 | -1.3705543 | 0.00631579 | 0.3910617  | 0.993 |
| V\$E2F_Q3               |      | 214 | -0.3045821 | -1.3676448 | 0.00909091 | 0.3813685  | 0.994 |
| V\$EVI1_03              |      | 46  | -0.3891891 | -1.3647718 | 0.0533049  | 0.37119076 | 0.995 |
| V\$SMAD3_Q6             |      | 203 | -0.3031859 | -1.3590547 | 0.01310044 | 0.3741324  | 0.997 |
| V\$AML1_Q6              |      | 240 | -0.2956955 | -1.3540615 | 0.01809955 | 0.3729231  | 0.998 |
| V\$NKX22_01             |      | 158 | -0.317044  | -1.3533521 | 0.02672606 | 0.3583222  | 0.998 |
| V\$HFH1_01              |      | 215 | -0.3021202 | -1.3487269 | 0.0087146  | 0.36005485 | 0.998 |
| V\$AML1_01              |      | 240 | -0.2956955 | -1.3477187 | 0.0137931  | 0.3483203  | 0.998 |
| V\$FOXO1_02             |      | 215 | -0.2949153 | -1.3463267 | 0.00697674 | 0.33836308 | 0.998 |
| V\$RP58_01              |      | 178 | -0.3019264 | -1.3356836 | 0.02252252 | 0.36630166 | 0.999 |
| V\$CHX10_01             |      | 191 | -0.298927  | -1.333554  | 0.01492537 | 0.3599701  | 0.999 |
| RRAGTTGT_UNKNOWN        |      | 230 | -0.2960938 | -1.3325471 | 0.01327434 | 0.3508565  | 0.999 |
| V\$HIF1_Q3              |      | 208 | -0.2936804 | -1.3314378 | 0.015625   | 0.34252292 | 0.999 |
| TGACGTCA_V\$ATF3_Q6     |      | 211 | -0.2929922 | -1.3294653 | 0.0046729  | 0.33794484 | 0.999 |
| V\$MEIS1AHOXA9_01       |      | 97  | -0.3268906 | -1.3261049 | 0.02553191 | 0.3381378  | 1     |

**UP**

| NAME                   | SIZE | ES  | NES        | NOM p-val | FDR q-val  | FWER p-val |       |
|------------------------|------|-----|------------|-----------|------------|------------|-------|
| V\$SRF_01              |      | 43  | 0.48542336 | 1.6573973 | 0.00718133 | 0.13352197 | 0.187 |
| CCAWWNAAGG_V\$SRF_Q4   |      | 80  | 0.40319514 | 1.5448364 | 0.00567108 | 0.2478092  | 0.539 |
| V\$TATA_01             |      | 193 | 0.30879465 | 1.3548863 | 0.01489758 | 1          | 0.999 |
| V\$ISRE_01             |      | 225 | 0.30589628 | 1.3501171 | 0.01092896 | 1          | 0.999 |
| V\$NFKAPPAB_01         |      | 217 | 0.30308276 | 1.3335816 | 0.02169982 | 1          | 0.999 |
| V\$HOX13_01            |      | 40  | 0.39323503 | 1.32752   | 0.10242086 | 0.93175566 | 0.999 |
| RGTTAMWNATT_V\$HNF1_01 |      | 53  | 0.37206316 | 1.3223978 | 0.06990291 | 0.8449261  | 0.999 |
| V\$SRF_C               |      | 190 | 0.30571803 | 1.321815  | 0.02678572 | 0.74310005 | 0.999 |

Mentioned in the Text

TRANSFAC: AS Deletion Neurons

**DOWN**

| NAME                | SIZE | ES         | NES        | NOM p-val  | FDR q-val  | FWER p-val |
|---------------------|------|------------|------------|------------|------------|------------|
| V\$OCT1_07          | 144  | -0.3807221 | -1.5705194 | 0          | 0.7485122  | 0.407      |
| V\$EVI1_03          | 49   | -0.4583496 | -1.5698875 | 0.01724138 | 0.37763244 | 0.41       |
| V\$IRF_Q6           | 227  | -0.3351715 | -1.4980567 | 0          | 0.5593537  | 0.711      |
| V\$ICSBP_Q6         | 231  | -0.3313863 | -1.4486657 | 0.002079   | 0.7329453  | 0.894      |
| AGCYRWTTTC_UNKNOWN  | 113  | -0.3535078 | -1.4262518 | 0.01054852 | 0.747513   | 0.944      |
| V\$MEIS1AHOXA9_01   | 100  | -0.3584329 | -1.4151071 | 0.02165354 | 0.7043254  | 0.965      |
| V\$EVI1_06          | 18   | -0.4935676 | -1.3844324 | 0.10229645 | 0.84814113 | 0.99       |
| V\$AML1_01          | 245  | -0.3101316 | -1.3788893 | 0.00410678 | 0.7864868  | 0.993      |
| V\$HP1SITEFACTOR_Q6 | 211  | -0.312507  | -1.3728573 | 0.00976563 | 0.7419695  | 0.994      |
| V\$AML1_Q6          | 245  | -0.3101316 | -1.3712174 | 0.00824742 | 0.6798666  | 0.994      |
| V\$AMEF2_Q6         | 234  | -0.3065637 | -1.3519431 | 0.01207244 | 0.75519454 | 0.997      |
| V\$HOX13_01         | 39   | -0.4132153 | -1.3484844 | 0.06614786 | 0.71743125 | 0.998      |
| V\$CDPCR3HD_01      | 215  | -0.3068185 | -1.3481336 | 0.01810865 | 0.6646419  | 0.998      |
| V\$POU3F2_01        | 86   | -0.3556489 | -1.3480694 | 0.04642166 | 0.6178575  | 0.998      |
| CATTGTYV_V\$SOX9_B1 | 338  | -0.2934313 | -1.3464539 | 0.00390625 | 0.58556753 | 0.998      |
| V\$E4BP4_01         | 208  | -0.309348  | -1.3416383 | 0.01782178 | 0.5763137  | 0.998      |
| V\$HFH4_01          | 179  | -0.315409  | -1.3405806 | 0.02647658 | 0.5487232  | 0.999      |
| V\$NKX61_01         | 202  | -0.3068869 | -1.3403333 | 0.01716738 | 0.5198254  | 0.999      |

**UP**

| NAME               | SIZE | ES         | NES       | NOM p-val  | FDR q-val | FWER p-val |
|--------------------|------|------------|-----------|------------|-----------|------------|
| V\$PAX3_01         | 22   | 0.51021683 | 1.497745  | 0.04393305 | 0.8342927 | 0.708      |
| V\$ALPHACP1_01     | 236  | 0.31215733 | 1.3771724 | 0.01639344 | 1         | 0.994      |
| CCAATNNSNNGCG_UNKI | 54   | 0.39008346 | 1.3762366 | 0.05761317 | 1         | 0.994      |

Mentioned in the Text

## GO: 15q Duplication Neurons

### DOWN

| NAME                                                       | SIZE | ES         | NES        | NOM p-val  | FDR q-val  | FWER p-val |
|------------------------------------------------------------|------|------------|------------|------------|------------|------------|
| CHROMOSOME_ORGANIZATION_AND_BIOGENESIS                     | 121  | -0.4339858 | -1.8201128 | 0          | 0.5585529  | 0.482      |
| CHROMATIN_ASSEMBLY_OR_DISASSEMBLY                          | 26   | -0.5826206 | -1.7727206 | 0.00639659 | 0.47712943 | 0.678      |
| ESTABLISHMENT_AND_OR_MAINTENANCE_OF_CHROMATIN_ARCHITECTURE | 75   | -0.4294769 | -1.6466404 | 0.00635593 | 1          | 0.98       |
| MACROMOLECULAR_COMPLEX_DISASSEMBLY                         | 15   | -0.6100932 | -1.6214776 | 0.02114165 | 1          | 0.997      |
| TRANSMEMBRANE_RECEPTOR_PROTEIN_PHOSPHATASE_ACTIVITY        | 18   | -0.580447  | -1.6134549 | 0.0210084  | 0.8977136  | 0.997      |
| REGULATION_OF_ACTION_POTENTIAL                             | 16   | -0.5768601 | -1.5918566 | 0.02459016 | 0.8929916  | 0.999      |
| CHROMATIN_ASSEMBLY                                         | 16   | -0.5808365 | -1.5697571 | 0.03131524 | 0.90862095 | 1          |
| GENERAL_RNA_POLYMERASE_II_TRANSCRIPTION_FACTOR_ACTIVITY    | 32   | -0.4683348 | -1.541086  | 0.0190678  | 0.9858792  | 1          |
| PORE_COMPLEX                                               | 36   | -0.4601928 | -1.5379628 | 0.02760085 | 0.89746743 | 1          |
| DNA_PACKAGING                                              | 32   | -0.4644173 | -1.5290788 | 0.01898734 | 0.8651769  | 1          |
| DENDRITE                                                   | 15   | -0.5660704 | -1.51138   | 0.04462475 | 0.8930051  | 1          |
| PEROXISOME_ORGANIZATION_AND_BIOGENESIS                     | 16   | -0.5441632 | -1.4997828 | 0.06029106 | 0.89454967 | 1          |
| PROTEIN_AMINO_ACID_DEPHOSPHORYLATION                       | 59   | -0.3967321 | -1.4777185 | 0.02985075 | 0.97494745 | 1          |
| SEQUENCE_SPECIFIC_DNA_BINDING                              | 55   | -0.4070704 | -1.4746774 | 0.01918977 | 0.9252741  | 1          |
| NUCLEAR_MEMBRANE                                           | 48   | -0.4211148 | -1.4667499 | 0.03416856 | 0.91236836 | 1          |
| NUCLEAR_PORE                                               | 31   | -0.440474  | -1.4466326 | 0.04365904 | 0.9843774  | 1          |

### UP

| NAME                                                        | SIZE | ES         | NES       | NOM p-val  | FDR q-val  | FWER p-val |
|-------------------------------------------------------------|------|------------|-----------|------------|------------|------------|
| STRUCTURAL_CONSTITUENT_OF_RIBOSOME                          | 79   | 0.60831857 | 2.3000758 | 0          | 0          | 0          |
| CHEMOKINE_ACTIVITY                                          | 34   | 0.5833463  | 1.884044  | 0          | 0.13948384 | 0.228      |
| CHEMOKINE_RECEPTOR_BINDING                                  | 34   | 0.5833463  | 1.8780724 | 0          | 0.10352428 | 0.246      |
| LIPID_HOMEOSTASIS                                           | 15   | 0.6839274  | 1.8327537 | 0.00385356 | 0.1398569  | 0.406      |
| CYTOKINE_ACTIVITY                                           | 81   | 0.47130308 | 1.8297948 | 0          | 0.11460169 | 0.409      |
| G_PROTEIN_COUPLED_RECEPTOR_BINDING                          | 44   | 0.5296605  | 1.8295625 | 0          | 0.09586461 | 0.409      |
| RESPONSE_TO_OXIDATIVE_STRESS                                | 43   | 0.5205627  | 1.7810241 | 0.00579151 | 0.15431596 | 0.611      |
| CHEMICAL_HOMEOSTASIS                                        | 134  | 0.42244628 | 1.7672718 | 0          | 0.15933107 | 0.659      |
| OXIDOREDUCTASE_ACTIVITY_ACTING_ON_THE_CH_CH_GROUP_OF_DONORS | 23   | 0.5848808  | 1.7657856 | 0.00773694 | 0.14387622 | 0.665      |
| OXIDOREDUCTASE_ACTIVITY_GO_0016616                          | 55   | 0.48507896 | 1.7547    | 0          | 0.14627519 | 0.711      |
| RHO_GTPASE_ACTIVATOR_ACTIVITY                               | 18   | 0.6055668  | 1.6716973 | 0.00968992 | 0.31963742 | 0.954      |
| ELECTRON_CARRIER_ACTIVITY                                   | 77   | 0.43772656 | 1.6659968 | 0.0019084  | 0.30756313 | 0.963      |
| REGULATION_OF_CYCLIN_DEPENDENT_PROTEIN_KINASE_ACTIVITY      | 41   | 0.49528235 | 1.6654005 | 0.00180832 | 0.28580397 | 0.964      |
| DEVELOPMENT_OF_PRIMARY_SEXUAL_CHARACTERISTICS               | 21   | 0.57378125 | 1.6525108 | 0.01142857 | 0.30238238 | 0.98       |
| GROWTH_FACTOR_BINDING                                       | 27   | 0.5301724  | 1.6514517 | 0.00598802 | 0.2844534  | 0.98       |
| OXIDOREDUCTASE_ACTIVITY_ACTING_ON_CH_OH_GROUP_OF_DONORS     | 60   | 0.4556028  | 1.6512581 | 0          | 0.26723757 | 0.98       |
| VESICLE_MEMBRANE                                            | 28   | 0.52973676 | 1.6331445 | 0.00369004 | 0.29772532 | 0.994      |
| SECONDARY_ACTIVE_TRANSMEMBRANE_TRANSPORTER_ACTIVITY         | 44   | 0.4733048  | 1.6209818 | 0.00584795 | 0.3127635  | 0.995      |
| RESPONSE_TO_EXTERNAL_STIMULUS                               | 263  | 0.3569134  | 1.6198318 | 0          | 0.29943386 | 0.995      |
| WOUND_HEALING                                               | 46   | 0.46991926 | 1.6192056 | 0.00948767 | 0.28596547 | 0.995      |
| GTPASE_ACTIVATOR_ACTIVITY                                   | 58   | 0.44672424 | 1.6129533 | 0.00377359 | 0.2888022  | 0.997      |

Mentioned in the Text

Also of interest

## GO: AS Deletion Neurons

### DOWN

| NAME                                                      | SIZE | ES         | NES        | NOM p-val  | FDR q-val  | FWER p-val |
|-----------------------------------------------------------|------|------------|------------|------------|------------|------------|
| CYTOKINESIS                                               | 18   | -0.6795768 | -1.8728243 | 0.00206186 | 0.3198453  | 0.251      |
| CELL_DIVISION                                             | 20   | -0.6347529 | -1.8209481 | 0          | 0.30862626 | 0.443      |
| REGULATION_OF_PEPTIDYL_TYROSINE_PHOSPHORYLATION           | 16   | -0.6616356 | -1.7688583 | 0.00194932 | 0.38295674 | 0.646      |
| CELL_CELL_ADHESION                                        | 79   | -0.4531722 | -1.7102556 | 0          | 0.5399729  | 0.859      |
| CELLULAR_MORPHOGENESIS_DURING_DIFFERENTIATION             | 46   | -0.4996825 | -1.6966162 | 0.01022495 | 0.48838636 | 0.896      |
| GROWTH_FACTOR_ACTIVITY                                    | 47   | -0.4905852 | -1.6842574 | 0.00202429 | 0.46317023 | 0.926      |
| ANION_CHANNEL_ACTIVITY                                    | 18   | -0.5992384 | -1.6670983 | 0.00814664 | 0.4731243  | 0.96       |
| LIGAND_GATED_CHANNEL_ACTIVITY                             | 35   | -0.5119488 | -1.6586397 | 0.01077586 | 0.44763425 | 0.965      |
| POSITIVE_REGULATION_OF_PROTEIN_AMINO_ACID_PHOSPHORYLATION | 18   | -0.5910826 | -1.6436394 | 0.01052632 | 0.46002585 | 0.983      |
| CHLORIDE_CHANNEL_ACTIVITY                                 | 18   | -0.5992384 | -1.6318763 | 0.01778656 | 0.45864907 | 0.99       |
| CELLULAR_RESPIRATION                                      | 19   | -0.5811528 | -1.6277045 | 0.02620968 | 0.43265176 | 0.991      |
| CHROMATIN_ASSEMBLY_OR_DISASSEMBLY                         | 26   | -0.545148  | -1.6260283 | 0.01361868 | 0.4017679  | 0.991      |
| REGULATION_OF_PROTEIN_AMINO_ACID_PHOSPHORYLATION          | 28   | -0.5269707 | -1.6205647 | 0.00828157 | 0.39110622 | 0.992      |
| NEURON_DEVELOPMENT                                        | 58   | -0.4515381 | -1.6056588 | 0.00788955 | 0.41111386 | 0.997      |
| METALLOPEPTIDASE_ACTIVITY                                 | 46   | -0.4605937 | -1.5976261 | 0.00801603 | 0.41039008 | 0.998      |
| POSITIVE_REGULATION_OF_PROTEIN_MODIFICATION_PROCESS       | 27   | -0.5169987 | -1.5852486 | 0.0244898  | 0.42801636 | 1          |
| NEURITE_DEVELOPMENT                                       | 50   | -0.4561331 | -1.5704453 | 0.01039501 | 0.45334646 | 1          |
| POSITIVE_REGULATION_OF_CELL_CYCLE                         | 16   | -0.5883299 | -1.5534823 | 0.03017241 | 0.49400184 | 1          |
| PEPTIDYL_TYROSINE_PHOSPHORYLATION                         | 25   | -0.5257874 | -1.5464498 | 0.02345416 | 0.49399638 | 1          |
| THIOLESTER_HYDROLASE_ACTIVITY                             | 15   | -0.5826979 | -1.5402362 | 0.03250478 | 0.49413928 | 1          |
| COLLAGEN                                                  | 22   | -0.5351812 | -1.5391032 | 0.03386454 | 0.47478908 | 1          |
| SULFURIC_ESTER_HYDROLASE_ACTIVITY                         | 16   | -0.5687776 | -1.5352945 | 0.04       | 0.46625507 | 1          |
| GLYCOLIPID_METABOLIC_PROCESS                              | 16   | -0.5713344 | -1.5301486 | 0.03784861 | 0.46270463 | 1          |
| CHROMOSOMEPERICENTRIC_REGION                              | 31   | -0.4808978 | -1.5228419 | 0.03483607 | 0.47023144 | 1          |
| REGULATION_OF_PROTEIN_MODIFICATION_PROCESS                | 42   | -0.445787  | -1.5141118 | 0.02574257 | 0.48172045 | 1          |
| AXONOGENESIS                                              | 41   | -0.4501657 | -1.5005414 | 0.02910603 | 0.5139358  | 1          |

### UP

| NAME                                                       | SIZE | ES         | NES       | NOM p-val  | FDR q-val  | FWER p-val |
|------------------------------------------------------------|------|------------|-----------|------------|------------|------------|
| STEROID_METABOLIC_PROCESS                                  | 64   | 0.50926155 | 1.8503424 | 0          | 0.39164612 | 0.35       |
| CHEMICAL_HOMEOSTASIS                                       | 136  | 0.44306058 | 1.8335853 | 0          | 0.23609515 | 0.4        |
| OXIDOREDUCTASE_ACTIVITY_GO_0016616                         | 55   | 0.49824286 | 1.7802109 | 0          | 0.31021947 | 0.619      |
| OXIDOREDUCTASE_ACTIVITY_ACTING_ON_THE_CH_CH_GROUP_OF_DONOR | 23   | 0.6051666  | 1.7617718 | 0.0019685  | 0.28931224 | 0.699      |
| OXIDOREDUCTASE_ACTIVITY_ACTING_ON_CH_OH_GROUP_OF_DONORS    | 60   | 0.47402784 | 1.7153921 | 0          | 0.37308097 | 0.854      |
| STEROID_BIOSYNTHETIC_PROCESS                               | 22   | 0.57602483 | 1.66491   | 0.00804829 | 0.509658   | 0.957      |
| NEGATIVE_REGULATION_OF_TRANSPORT                           | 17   | 0.6166911  | 1.6592981 | 0.00744879 | 0.46184468 | 0.965      |
| POTASSIUM_ION_TRANSPORT                                    | 49   | 0.47788802 | 1.6390767 | 0.0040568  | 0.4850235  | 0.98       |
| VOLTAGE_GATED_POTASSIUM_CHANNEL_COMPLEX                    | 37   | 0.49696887 | 1.6127906 | 0.02053388 | 0.5496902  | 0.996      |
| OXIDOREDUCTASE_ACTIVITY_GO_0016705                         | 31   | 0.51510423 | 1.6080852 | 0.01635992 | 0.51577073 | 0.997      |
| REGULATION_OF_SECRETION                                    | 33   | 0.5096709  | 1.6061571 | 0.00590551 | 0.47715434 | 0.997      |
| ATPASE_ACTIVITY_COUPLED_TO_TRANSMEMBRANE_MOVEMENT_OF_IOI   | 18   | 0.5774405  | 1.5980569 | 0.01953125 | 0.47134835 | 0.997      |
| ION_HOMEOSTASIS                                            | 112  | 0.39221933 | 1.5854561 | 0.00398406 | 0.48894048 | 0.999      |
| PROTEIN_PROCESSING                                         | 48   | 0.45572343 | 1.5844144 | 0.01214575 | 0.45853817 | 0.999      |
| NEUROPEPTIDE_RECEPTOR_ACTIVITY                             | 15   | 0.5987516  | 1.582735  | 0.03143419 | 0.4331638  | 0.999      |
| CELLULAR_CATION_HOMEOSTASIS                                | 93   | 0.40122604 | 1.5781736 | 0.0038835  | 0.42337033 | 0.999      |
| OXYGEN_BINDING                                             | 19   | 0.5668802  | 1.5750759 | 0.02941177 | 0.40749937 | 0.999      |
| NEUROPEPTIDE_BINDING                                       | 15   | 0.5987516  | 1.5654978 | 0.00976563 | 0.4164075  | 1          |
| CARBOHYDRATE_TRANSPORT                                     | 16   | 0.58402526 | 1.5534754 | 0.03292181 | 0.4337085  | 1          |
| RESPONSE_TO_NUTRIENT_LEVELS                                | 28   | 0.5217431  | 1.5502299 | 0.02514507 | 0.4233382  | 1          |
| SIGNAL_SEQUENCE_BINDING                                    | 15   | 0.5940841  | 1.549926  | 0.04743083 | 0.4040046  | 1          |
| CARBOHYDRATE_TRANSMEMBRANE_TRANSPORTER_ACTIVITY            | 15   | 0.5963993  | 1.5387459 | 0.03653846 | 0.42123857 | 1          |
| VOLTAGE_GATED_POTASSIUM_CHANNEL_ACTIVITY                   | 33   | 0.4852749  | 1.535342  | 0.01945525 | 0.4140759  | 1          |

|  |                       |
|--|-----------------------|
|  | Mentioned in the Text |
|  | Also of interest      |

## KEGG: 15q Duplication Neurons

### DOWN

| NAME                                                      | SIZE | ES         | NES        | NOM p-val  | FDR q-val  | FWER p-val |
|-----------------------------------------------------------|------|------------|------------|------------|------------|------------|
| KEGG_NITROGEN_METABOLISM                                  | 21   | -0.6195197 | -1.8528584 | 0.0021692  | 0.04190687 | 0.05       |
| KEGG_DORSO_VENTRAL_AXIS_FORMATION                         | 23   | -0.5353528 | -1.5962297 | 0.02040816 | 0.31829458 | 0.535      |
| KEGG_COLORECTAL_CANCER                                    | 61   | -0.4084651 | -1.5107552 | 0.01750547 | 0.4364343  | 0.796      |
| KEGG_GLYCEROPHOSPHOLIPID_METABOLISM                       | 68   | -0.3824661 | -1.4601109 | 0.0203252  | 0.48245612 | 0.911      |
| KEGG_O_GLYCAN_BIOSYNTHESIS                                | 26   | -0.4429121 | -1.376868  | 0.0755102  | 0.70290583 | 0.995      |
| KEGG_ALANINE_ASPARTATE_AND_GLUTAMATE_METABOLISM           | 30   | -0.4142374 | -1.3466687 | 0.09052631 | 0.72519404 | 0.998      |
| KEGG_PROSTATE_CANCER                                      | 86   | -0.3274035 | -1.3183947 | 0.0516129  | 0.74953264 | 1          |
| KEGG_GLYCOSYLPHOSPHATIDYLINOSITOL_GPI_ANCHOR_BIOSYNTHESIS | 24   | -0.4263476 | -1.2987518 | 0.12847966 | 0.73861414 | 1          |
| KEGG_RENAL_CELL_CARCINOMA                                 | 68   | -0.3336962 | -1.2761695 | 0.08478261 | 0.75236195 | 1          |
| KEGG_RNA_DEGRADATION                                      | 55   | -0.3399249 | -1.2471025 | 0.10775862 | 0.8043293  | 1          |
| KEGG_MTOR_SIGNALING_PATHWAY                               | 51   | -0.3382346 | -1.2241685 | 0.16059957 | 0.8366159  | 1          |
| KEGG_PROGESTERONE_MEDIATED_OOCYTE_MATURATION              | 82   | -0.307321  | -1.2127756 | 0.15010571 | 0.8168095  | 1          |
| KEGG_LYSINE_DEGRADATION                                   | 43   | -0.3535678 | -1.211876  | 0.1655914  | 0.757375   | 1          |
| KEGG_CALCIIUM_SIGNALING_PATHWAY                           | 158  | -0.2761783 | -1.2018442 | 0.09368192 | 0.7449851  | 1          |
| KEGG_AMINOACYL_TRNA_BIOSYNTHESIS                          | 40   | -0.3439494 | -1.1756773 | 0.22020201 | 0.8042487  | 1          |
| KEGG_AMYOTROPHIC_LATERAL_SCLEROSIS_ALS                    | 46   | -0.3187745 | -1.1364563 | 0.22520661 | 0.9308508  | 1          |
| KEGG_OOCYTE_MEIOSIS                                       | 104  | -0.2766291 | -1.1350114 | 0.18979591 | 0.88252515 | 1          |
| KEGG_PEROXISOME                                           | 75   | -0.2940089 | -1.1291635 | 0.25211865 | 0.85886955 | 1          |
| KEGG_CELL_ADHESION_MOLECULES_CAMS                         | 108  | -0.2709754 | -1.1256946 | 0.21365638 | 0.82850426 | 1          |
| KEGG_NATURAL_KILLER_CELL_MEDIATED_CYTOTOXICITY            | 96   | -0.2784223 | -1.124122  | 0.21318682 | 0.79267675 | 1          |

### UP

| NAME                                               | SIZE       | ES                | NES              | NOM p-val         | FDR q-val         | FWER p-val   |
|----------------------------------------------------|------------|-------------------|------------------|-------------------|-------------------|--------------|
| KEGG_RIBOSOME                                      | 86         | 0.6251042         | 2.4255242        | 0                 | 0                 | 0            |
| KEGG_NOD_LIKE_RECEPTOR_SIGNALING_PATHWAY           | 59         | 0.5316615         | 1.9352894        | 0                 | 0.00627027        | 0.011        |
| KEGG_OXIDATIVE_PHOSPHORYLATION                     | 109        | 0.45912483        | 1.842193         | 0                 | 0.02433797        | 0.06         |
| KEGG_PARKINSONS_DISEASE                            | 108        | 0.4482542         | 1.8021054        | 0                 | 0.03072979        | 0.099        |
| KEGG_FRUCTOSE_AND_MANNANOSE_METABOLISM             | 32         | 0.53406686        | 1.7226743        | 0.00380952        | 0.05994333        | 0.224        |
| KEGG_BUTANOATE_METABOLISM                          | 33         | 0.5276093         | 1.6830931        | 0.0094697         | 0.07439231        | 0.319        |
| KEGG_CYTOSOLIC_DNA_SENSING_PATHWAY                 | 43         | 0.44892675        | 1.5230733        | 0.02480916        | 0.2722843         | 0.803        |
| KEGG_GRAFT_VERSUS_HOST_DISEASE                     | 18         | 0.54067326        | 1.5114006        | 0.03944773        | 0.26209706        | 0.835        |
| <b>KEGG_STEROID_BIOSYNTHESIS</b>                   | <b>17</b>  | <b>0.5389776</b>  | <b>1.5104612</b> | <b>0.05343511</b> | <b>0.23531026</b> | <b>0.838</b> |
| KEGG_GLYCOLYSIS_GLUONEOGENESIS                     | 56         | 0.4155577         | 1.5070602        | 0.01541426        | 0.21801564        | 0.846        |
| <b>KEGG_CYTOKINE_CYTOKINE_RECEPTOR_INTERACTION</b> | <b>197</b> | <b>0.34570226</b> | <b>1.502887</b>  | <b>0.0017762</b>  | <b>0.20495717</b> | <b>0.857</b> |
| KEGG_HUNTINGTONS_DISEASE                           | 164        | 0.35330614        | 1.5002633        | 0.00170068        | 0.19295803        | 0.868        |
| KEGG_AMINO_SUGAR_AND_NUCLEOTIDE_SUGAR_METABOLISM   | 42         | 0.4381724         | 1.4954516        | 0.0310219         | 0.18418214        | 0.873        |
| KEGG_GALACTOSE_METABOLISM                          | 24         | 0.49400884        | 1.493101         | 0.03180914        | 0.17509758        | 0.877        |
| KEGG_METABOLISM_OF_XENOBIOTICS_BY_CYTOCHROME_P450  | 50         | 0.4093204         | 1.453237         | 0.0323741         | 0.22599593        | 0.95         |
| KEGG_BLADDER_CANCER                                | 41         | 0.42557076        | 1.4399163        | 0.04323308        | 0.23295492        | 0.961        |
| KEGG_VALINE_LEUCINE_AND_ISOLEUCINE_DEGRADATION     | 44         | 0.41345498        | 1.4374782        | 0.03551402        | 0.22274841        | 0.962        |
| KEGG_FATTY_ACID_METABOLISM                         | 41         | 0.42373234        | 1.4245584        | 0.04036697        | 0.23309301        | 0.976        |
| KEGG_TYROSINE_METABOLISM                           | 34         | 0.43931115        | 1.4240425        | 0.05323194        | 0.22209801        | 0.976        |
| KEGG_ALZHEIMERS_DISEASE                            | 147        | 0.33042386        | 1.4001417        | 0.01094891        | 0.25217772        | 0.985        |
| KEGG_P53_SIGNALING_PATHWAY                         | 64         | 0.37650755        | 1.3924896        | 0.03690037        | 0.25440663        | 0.988        |
| KEGG_COMPLEMENT_AND_COAGULATION_CASCADES           | 57         | 0.38298565        | 1.3846358        | 0.04752852        | 0.25584307        | 0.991        |
| KEGG_GAP_JUNCTION                                  | 83         | 0.35940734        | 1.3708907        | 0.02573529        | 0.2696298         | 0.995        |
| KEGG_PRIMARY_IMMUNODEFICIENCY                      | 24         | 0.44865113        | 1.357959         | 0.07339449        | 0.28243303        | 0.998        |
| <b>KEGG_STEROID_HORMONE_BIOSYNTHESIS</b>           | <b>34</b>  | <b>0.41790196</b> | <b>1.3535304</b> | <b>0.08914729</b> | <b>0.27886382</b> | <b>0.998</b> |
| KEGG_LYSOSOME                                      | 116        | 0.3170462         | 1.28857          | 0.07191781        | 0.41091797        | 1            |
| <b>KEGG_CHEMOKINE_SIGNALING_PATHWAY</b>            | <b>164</b> | <b>0.30074504</b> | <b>1.2801428</b> | <b>0.03723404</b> | <b>0.41790593</b> | <b>1</b>     |

Mentioned in the Text



## KEGG: AS Deletion Neurons

### DOWN

| NAME                                            | SIZE | ES         | NES        | NOM p-val  | FDR q-val  | FWER p-val |
|-------------------------------------------------|------|------------|------------|------------|------------|------------|
| KEGG_LONG_TERM_DEPRESSION                       | 62   | -0.4619342 | -1.6945065 | 0          | 0.4060894  | 0.284      |
| KEGG_ALZHEIMERS_DISEASE                         | 145  | -0.3698002 | -1.5450963 | 0.0021322  | 0.82666373 | 0.747      |
| KEGG_DRUG_METABOLISM_OTHER_ENZYMES              | 38   | -0.4680263 | -1.5383085 | 0.02282158 | 0.5832817  | 0.764      |
| KEGG_SMALL_CELL_LUNG_CANCER                     | 83   | -0.396     | -1.5047491 | 0.0087146  | 0.5771273  | 0.856      |
| KEGG_CALCIIUM_SIGNALING_PATHWAY                 | 159  | -0.3523216 | -1.4686618 | 0.01434426 | 0.6066712  | 0.922      |
| KEGG_LYSINE_DEGRADATION                         | 44   | -0.4264061 | -1.4446168 | 0.02589642 | 0.60743296 | 0.953      |
| KEGG_PARKINSONS_DISEASE                         | 108  | -0.357089  | -1.4245723 | 0.01026694 | 0.6023005  | 0.973      |
| KEGG_PRION_DISEASES                             | 31   | -0.4528733 | -1.4236437 | 0.06746032 | 0.53044367 | 0.973      |
| KEGG_VASCULAR_SMOOTH_MUSCLE_CONTRACTION         | 102  | -0.3595672 | -1.4170115 | 0.01207244 | 0.49426493 | 0.978      |
| KEGG_MELANOGENESIS                              | 92   | -0.3574246 | -1.397897  | 0.03067485 | 0.5071475  | 0.985      |
| KEGG_ALANINE_ASPARTATE_AND_Glutamate_METABOLISM | 30   | -0.4466879 | -1.3961729 | 0.07489879 | 0.46770537 | 0.986      |
| KEGG_ECM_RECEPTOR_INTERACTION                   | 79   | -0.365923  | -1.3891255 | 0.03151261 | 0.45221663 | 0.987      |
| KEGG_SELENOAMINO_ACID_METABOLISM                | 24   | -0.4673972 | -1.373588  | 0.08033827 | 0.46872815 | 0.99       |
| KEGG_LONG_TERM_POTENTIATION                     | 62   | -0.3726961 | -1.3586869 | 0.04990403 | 0.4833538  | 0.993      |
| KEGG_GLIOMA                                     | 62   | -0.3725277 | -1.3579254 | 0.0491453  | 0.4530296  | 0.993      |
| KEGG_AMYOTROPHIC_LATERAL_SCLEROSIS_ALS          | 46   | -0.392426  | -1.3503655 | 0.06378601 | 0.44834524 | 0.995      |
| KEGG_PANTOTHENATE_AND_COA_BIOSYNTHESIS          | 15   | -0.5100718 | -1.3433353 | 0.14609054 | 0.44290158 | 0.997      |
| KEGG_SPHINGOLIPID_METABOLISM                    | 35   | -0.4174554 | -1.3421384 | 0.09696969 | 0.42120445 | 0.997      |
| KEGG_RENIN_ANGIOTENSIN_SYSTEM                   | 15   | -0.4954344 | -1.3377883 | 0.11195446 | 0.41043818 | 0.998      |
| KEGG_NOTCH_SIGNALING_PATHWAY                    | 43   | -0.3982469 | -1.3349452 | 0.0724346  | 0.39750975 | 0.998      |
| KEGG_VIBRIO_CHOLERAEE_INFECTION                 | 53   | -0.3761694 | -1.3150212 | 0.10240964 | 0.4308302  | 1          |

### UP

| NAME                                              | SIZE | ES         | NES       | NOM p-val  | FDR q-val  | FWER p-val |
|---------------------------------------------------|------|------------|-----------|------------|------------|------------|
| KEGG_STEROID_BIOSYNTHESIS                         | 17   | 0.79428303 | 2.1545434 | 0          | 7.91E-04   | 0.001      |
| KEGG_FRUCTOSE_AND_MANNULOSE_METABOLISM            | 33   | 0.60110503 | 1.8836194 | 0.00192308 | 0.01389321 | 0.037      |
| KEGG_STEROID_HORMONE_BIOSYNTHESIS                 | 40   | 0.54847443 | 1.8275898 | 0          | 0.01820514 | 0.071      |
| KEGG_TERPENOID_BACKBONE_BIOSYNTHESIS              | 15   | 0.6516438  | 1.7261577 | 0.01145038 | 0.04510398 | 0.21       |
| KEGG_PENTULOSE_PHOSPHATE_PATHWAY                  | 25   | 0.5772126  | 1.683968  | 0.0113852  | 0.05559753 | 0.301      |
| KEGG_GLYCOLYSIS_GLUCONOGENESIS                    | 58   | 0.45955414 | 1.6402068 | 0.00393701 | 0.07311387 | 0.438      |
| KEGG_METABOLISM_OF_XENOBIOTICS_BY_CYTOCHROME_P450 | 57   | 0.4583219  | 1.6067728 | 0.00401606 | 0.08702132 | 0.559      |
| KEGG_RNA_POLYMERASE                               | 29   | 0.5114668  | 1.5849962 | 0.00578035 | 0.09407733 | 0.637      |
| KEGG_BASAL_TRANSCRIPTION_FACTORS                  | 33   | 0.48395783 | 1.5266265 | 0.03428571 | 0.13768664 | 0.802      |
| KEGG_BIOSYNTHESIS_OF_UNSATURATED_FATTY_ACIDS      | 22   | 0.46971262 | 1.3734919 | 0.09942639 | 0.3916363  | 0.997      |
| KEGG_RIBOSOME                                     | 86   | 0.35412627 | 1.372683  | 0.0368217  | 0.35812816 | 0.997      |
| KEGG_ALDOSTERONE_REGULATED_SODIUM_REABSORPTION    | 37   | 0.41842628 | 1.3668619 | 0.07677165 | 0.34231362 | 0.998      |
| KEGG_PPAR_SIGNALING_PATHWAY                       | 62   | 0.3655422  | 1.3473259 | 0.06262231 | 0.3612048  | 0.999      |
| KEGG_GLYCEROLIPID_METABOLISM                      | 47   | 0.38226116 | 1.3127617 | 0.06967213 | 0.42007983 | 1          |
| KEGG_AMINO_SUGAR_AND_NUCLEOTIDE_SUGAR_METABOLISM  | 42   | 0.38038158 | 1.2725906 | 0.10836502 | 0.5034263  | 1          |
| KEGG_GLYCOSAMINOGLYCAN_DEGRADATION                | 21   | 0.40839535 | 1.1981012 | 0.21301775 | 0.73112905 | 1          |
| KEGG_GLYCOSAMINOGLYCAN_BIOSYNTHESIS_CHONDROITIN_S | 20   | 0.42574117 | 1.1892812 | 0.2267658  | 0.7216315  | 1          |
| KEGG_STARCH_AND_SUCROSE_METABOLISM                | 40   | 0.353763   | 1.1885904 | 0.18958333 | 0.6851217  | 1          |
| KEGG_THYROID_CANCER                               | 28   | 0.38601628 | 1.1878542 | 0.21359223 | 0.65200734 | 1          |
| KEGG_PROTEASOME                                   | 41   | 0.35376793 | 1.1820115 | 0.20292504 | 0.63990986 | 1          |

Mentioned in the Text

Also of interest
