# Supplementary material for: Significant transcriptional changes in 15q duplication but not Angelman syndrome deletion stem cell-derived neurons
Source: Mol Autism. 2018 Jan 27;9:6. doi: 10.1186/s13229-018-0191-y (PMC5787244; doi:10.1186/s13229-018-0191-y)
Supplement: Supplementary file 1 — Complete GSEA analysis for all samples and FOXO1 and functional enrichment analysis of ASD brain vs Dup15q DPSC neurons. S9 is a table of primers used for qRT-PCR. (XLSX 68 kb) [file 13229_2018_191_MOESM1_ESM.xlsx]

## Sheet: TFT_15q_Neurons
DOWN
NAME	SIZE	ES	NES	NOM p-val	FDR q-val	FWER p-val
GCGSCMNTTT_UNKNOWN	64	-0.509431	-1.89331	0	0.0250192	0.017
V$OCT1_06	226	-0.393388	-1.7968	0	0.0273334	0.035
V$NKX61_01	198	-0.364963	-1.62304	0	0.130794	0.23
V$EN1_01	98	-0.40003	-1.59659	0.00420168	0.133977	0.301
V$CEBP_Q3	223	-0.351845	-1.58786	0	0.119624	0.331
V$HP1SITEFACTOR_Q6	208	-0.345242	-1.53499	0.0021645	0.184669	0.516
V$MYOGNF1_01	39	-0.430045	-1.48313	0.0262626	0.279765	0.743
V$GATA1_01	221	-0.322842	-1.45292	0	0.335646	0.85
V$SOX9_B1	217	-0.319188	-1.42363	0.0046729	0.410076	0.934
V$SREBP_Q3	218	-0.309088	-1.4095	0.00888889	0.430285	0.96
V$OCT1_07	141	-0.332982	-1.40778	0.0154525	0.397339	0.96
YGCANTGCR_UNKNOWN	119	-0.338135	-1.4044	0.0211864	0.380837	0.968
V$DR3_Q4	124	-0.331809	-1.39325	0.0147679	0.398271	0.981
MYAATNNNNNNNGGC_UNKNOWN	99	-0.346915	-1.39117	0.0229645	0.377454	0.983
V$VDR_Q3	192	-0.312721	-1.38955	0.00445434	0.358475	0.985
V$SRY_02	229	-0.306006	-1.38042	0.0110619	0.374152	0.992
V$AP3_Q6	217	-0.302568	-1.37055	0.00631579	0.391062	0.993
V$E2F_Q3	214	-0.304582	-1.36764	0.00909091	0.381368	0.994
V$EVI1_03	46	-0.389189	-1.36477	0.0533049	0.371191	0.995
V$SMAD3_Q6	203	-0.303186	-1.35905	0.0131004	0.374132	0.997
V$AML1_Q6	240	-0.295695	-1.35406	0.0180995	0.372923	0.998
V$NKX22_01	158	-0.317044	-1.35335	0.0267261	0.358322	0.998
V$HFH1_01	215	-0.30212	-1.34873	0.0087146	0.360055	0.998
V$AML1_01	240	-0.295695	-1.34772	0.0137931	0.34832	0.998
V$FOXO1_02	215	-0.294915	-1.34633	0.00697674	0.338363	0.998
V$RP58_01	178	-0.301926	-1.33568	0.0225225	0.366302	0.999
V$CHX10_01	191	-0.298927	-1.33355	0.0149254	0.35997	0.999
RRAGTTGT_UNKNOWN	230	-0.296094	-1.33255	0.0132743	0.350857	0.999
V$HIF1_Q3	208	-0.29368	-1.33144	0.015625	0.342523	0.999
TGACGTCA_V$ATF3_Q6	211	-0.292992	-1.32947	0.0046729	0.337945	0.999
V$MEIS1AHOXA9_01	97	-0.326891	-1.3261	0.0255319	0.338138	1
UP
NAME	SIZE	ES	NES	NOM p-val	FDR q-val	FWER p-val
V$SRF_01	43	0.485423	1.6574	0.00718133	0.133522	0.187
CCAWWNAAGG_V$SRF_Q4	80	0.403195	1.54484	0.00567108	0.247809	0.539
V$TATA_01	193	0.308795	1.35489	0.0148976	1	0.999
V$ISRE_01	225	0.305896	1.35012	0.010929	1	0.999
V$NFKAPPAB_01	217	0.303083	1.33358	0.0216998	1	0.999
V$HOX13_01	40	0.393235	1.32752	0.102421	0.931756	0.999
RGTTAMWNATT_V$HNF1_01	53	0.372063	1.3224	0.0699029	0.844926	0.999
V$SRF_C	190	0.305718	1.32181	0.0267857	0.7431	0.999
	Mentioned in the Text

## Sheet: TFT_AS_Neurons
DOWN
NAME	SIZE	ES	NES	NOM p-val	FDR q-val	FWER p-val
V$OCT1_07	144	-0.380722	-1.57052	0	0.748512	0.407
V$EVI1_03	49	-0.45835	-1.56989	0.0172414	0.377632	0.41
V$IRF_Q6	227	-0.335172	-1.49806	0	0.559354	0.711
V$ICSBP_Q6	231	-0.331386	-1.44867	0.002079	0.732945	0.894
AGCYRWTTC_UNKNOWN	113	-0.353508	-1.42625	0.0105485	0.747513	0.944
V$MEIS1AHOXA9_01	100	-0.358433	-1.41511	0.0216535	0.704325	0.965
V$EVI1_06	18	-0.493568	-1.38443	0.102296	0.848141	0.99
V$AML1_01	245	-0.310132	-1.37889	0.00410678	0.786487	0.993
V$HP1SITEFACTOR_Q6	211	-0.312507	-1.37286	0.00976562	0.741969	0.994
V$AML1_Q6	245	-0.310132	-1.37122	0.00824742	0.679867	0.994
V$AMEF2_Q6	234	-0.306564	-1.35194	0.0120724	0.755195	0.997
V$HOX13_01	39	-0.413215	-1.34848	0.0661479	0.717431	0.998
V$CDPCR3HD_01	215	-0.306818	-1.34813	0.0181087	0.664642	0.998
V$POU3F2_01	86	-0.355649	-1.34807	0.0464217	0.617857	0.998
CATTGTYY_V$SOX9_B1	338	-0.293431	-1.34645	0.00390625	0.585568	0.998
V$E4BP4_01	208	-0.309348	-1.34164	0.0178218	0.576314	0.998
V$HFH4_01	179	-0.315409	-1.34058	0.0264766	0.548723	0.999
V$NKX61_01	202	-0.306887	-1.34033	0.0171674	0.519825	0.999
UP
NAME	SIZE	ES	NES	NOM p-val	FDR q-val	FWER p-val
V$PAX3_01	22	0.510217	1.49775	0.0439331	0.834293	0.708
V$ALPHACP1_01	236	0.312157	1.37717	0.0163934	1	0.994
CCAATNNSNNNGCG_UNKNOWN	54	0.390083	1.37624	0.0576132	1	0.994
	Mentioned in the Text

## Sheet: GO_15q_Neurons
DOWN
NAME	SIZE	ES	NES	NOM p-val	FDR q-val	FWER p-val
CHROMOSOME_ORGANIZATION_AND_BIOGENESIS	121	-0.433986	-1.82011	0	0.558553	0.482
CHROMATIN_ASSEMBLY_OR_DISASSEMBLY	26	-0.582621	-1.77272	0.00639659	0.477129	0.678
ESTABLISHMENT_AND_OR_MAINTENANCE_OF_CHROMATIN_ARCHITECTURE	75	-0.429477	-1.64664	0.00635593	1	0.98
MACROMOLECULAR_COMPLEX_DISASSEMBLY	15	-0.610093	-1.62148	0.0211416	1	0.997
TRANSMEMBRANE_RECEPTOR_PROTEIN_PHOSPHATASE_ACTIVITY	18	-0.580447	-1.61345	0.0210084	0.897714	0.997
REGULATION_OF_ACTION_POTENTIAL	16	-0.57686	-1.59186	0.0245902	0.892992	0.999
CHROMATIN_ASSEMBLY	16	-0.580837	-1.56976	0.0313152	0.908621	1
GENERAL_RNA_POLYMERASE_II_TRANSCRIPTION_FACTOR_ACTIVITY	32	-0.468335	-1.54109	0.0190678	0.985879	1
PORE_COMPLEX	36	-0.460193	-1.53796	0.0276008	0.897467	1
DNA_PACKAGING	32	-0.464417	-1.52908	0.0189873	0.865177	1
DENDRITE	15	-0.56607	-1.51138	0.0446247	0.893005	1
PEROXISOME_ORGANIZATION_AND_BIOGENESIS	16	-0.544163	-1.49978	0.0602911	0.89455	1
PROTEIN_AMINO_ACID_DEPHOSPHORYLATION	59	-0.396732	-1.47772	0.0298507	0.974947	1
SEQUENCE_SPECIFIC_DNA_BINDING	55	-0.40707	-1.47468	0.0191898	0.925274	1
NUCLEAR_MEMBRANE	48	-0.421115	-1.46675	0.0341686	0.912368	1
NUCLEAR_PORE	31	-0.440474	-1.44663	0.043659	0.984377	1
UP
NAME	SIZE	ES	NES	NOM p-val	FDR q-val	FWER p-val
STRUCTURAL_CONSTITUENT_OF_RIBOSOME	79	0.608319	2.30008	0	0	0
CHEMOKINE_ACTIVITY	34	0.583346	1.88404	0	0.139484	0.228
CHEMOKINE_RECEPTOR_BINDING	34	0.583346	1.87807	0	0.103524	0.246
LIPID_HOMEOSTASIS	15	0.683927	1.83275	0.00385356	0.139857	0.406
CYTOKINE_ACTIVITY	81	0.471303	1.82979	0	0.114602	0.409
G_PROTEIN_COUPLED_RECEPTOR_BINDING	44	0.52966	1.82956	0	0.0958646	0.409
RESPONSE_TO_OXIDATIVE_STRESS	43	0.520563	1.78102	0.00579151	0.154316	0.611
CHEMICAL_HOMEOSTASIS	134	0.422446	1.76727	0	0.159331	0.659
OXIDOREDUCTASE_ACTIVITY_ACTING_ON_THE_CH_CH_GROUP_OF_DONORS	23	0.584881	1.76579	0.00773694	0.143876	0.665
OXIDOREDUCTASE_ACTIVITY_GO_0016616	55	0.485079	1.7547	0	0.146275	0.711
RHO_GTPASE_ACTIVATOR_ACTIVITY	18	0.605567	1.6717	0.00968992	0.319637	0.954
ELECTRON_CARRIER_ACTIVITY	77	0.437727	1.666	0.0019084	0.307563	0.963
REGULATION_OF_CYCLIN_DEPENDENT_PROTEIN_KINASE_ACTIVITY	41	0.495282	1.6654	0.00180832	0.285804	0.964
DEVELOPMENT_OF_PRIMARY_SEXUAL_CHARACTERISTICS	21	0.573781	1.65251	0.0114286	0.302382	0.98
GROWTH_FACTOR_BINDING	27	0.530172	1.65145	0.00598802	0.284453	0.98
OXIDOREDUCTASE_ACTIVITY_ACTING_ON_CH_OH_GROUP_OF_DONORS	60	0.455603	1.65126	0	0.267238	0.98
VESICLE_MEMBRANE	28	0.529737	1.63314	0.00369004	0.297725	0.994
SECONDARY_ACTIVE_TRANSMEMBRANE_TRANSPORTER_ACTIVITY	44	0.473305	1.62098	0.00584795	0.312764	0.995
RESPONSE_TO_EXTERNAL_STIMULUS	263	0.356913	1.61983	0	0.299434	0.995
WOUND_HEALING	46	0.469919	1.61921	0.00948767	0.285965	0.995
GTPASE_ACTIVATOR_ACTIVITY	58	0.446724	1.61295	0.00377358	0.288802	0.997
	Mentioned in the Text
	Also of interest

## Sheet: GO_AS_Neurons
DOWN
NAME	SIZE	ES	NES	NOM p-val	FDR q-val	FWER p-val
CYTOKINESIS	18	-0.679577	-1.87282	0.00206186	0.319845	0.251
CELL_DIVISION	20	-0.634753	-1.82095	0	0.308626	0.443
REGULATION_OF_PEPTIDYL_TYROSINE_PHOSPHORYLATION	16	-0.661636	-1.76886	0.00194932	0.382957	0.646
CELL_CELL_ADHESION	79	-0.453172	-1.71026	0	0.539973	0.859
CELLULAR_MORPHOGENESIS_DURING_DIFFERENTIATION	46	-0.499683	-1.69662	0.0102249	0.488386	0.896
GROWTH_FACTOR_ACTIVITY	47	-0.490585	-1.68426	0.00202429	0.46317	0.926
ANION_CHANNEL_ACTIVITY	18	-0.599238	-1.6671	0.00814664	0.473124	0.96
LIGAND_GATED_CHANNEL_ACTIVITY	35	-0.511949	-1.65864	0.0107759	0.447634	0.965
POSITIVE_REGULATION_OF_PROTEIN_AMINO_ACID_PHOSPHORYLATION	18	-0.591083	-1.64364	0.0105263	0.460026	0.983
CHLORIDE_CHANNEL_ACTIVITY	18	-0.599238	-1.63188	0.0177866	0.458649	0.99
CELLULAR_RESPIRATION	19	-0.581153	-1.6277	0.0262097	0.432652	0.991
CHROMATIN_ASSEMBLY_OR_DISASSEMBLY	26	-0.545148	-1.62603	0.0136187	0.401768	0.991
REGULATION_OF_PROTEIN_AMINO_ACID_PHOSPHORYLATION	28	-0.526971	-1.62056	0.00828157	0.391106	0.992
NEURON_DEVELOPMENT	58	-0.451538	-1.60566	0.00788955	0.411114	0.997
METALLOPEPTIDASE_ACTIVITY	46	-0.460594	-1.59763	0.00801603	0.41039	0.998
POSITIVE_REGULATION_OF_PROTEIN_MODIFICATION_PROCESS	27	-0.516999	-1.58525	0.0244898	0.428016	1
NEURITE_DEVELOPMENT	50	-0.456133	-1.57045	0.010395	0.453346	1
POSITIVE_REGULATION_OF_CELL_CYCLE	16	-0.58833	-1.55348	0.0301724	0.494002	1
PEPTIDYL_TYROSINE_PHOSPHORYLATION	25	-0.525787	-1.54645	0.0234542	0.493996	1
THIOLESTER_HYDROLASE_ACTIVITY	15	-0.582698	-1.54024	0.0325048	0.494139	1
COLLAGEN	22	-0.535181	-1.5391	0.0338645	0.474789	1
SULFURIC_ESTER_HYDROLASE_ACTIVITY	16	-0.568778	-1.53529	0.04	0.466255	1
GLYCOLIPID_METABOLIC_PROCESS	16	-0.571334	-1.53015	0.0378486	0.462705	1
CHROMOSOMEPERICENTRIC_REGION	31	-0.480898	-1.52284	0.0348361	0.470231	1
REGULATION_OF_PROTEIN_MODIFICATION_PROCESS	42	-0.445787	-1.51411	0.0257426	0.48172	1
AXONOGENESIS	41	-0.450166	-1.50054	0.029106	0.513936	1
UP
NAME	SIZE	ES	NES	NOM p-val	FDR q-val	FWER p-val
STEROID_METABOLIC_PROCESS	64	0.509262	1.85034	0	0.391646	0.35
CHEMICAL_HOMEOSTASIS	136	0.443061	1.83359	0	0.236095	0.4
OXIDOREDUCTASE_ACTIVITY_GO_0016616	55	0.498243	1.78021	0	0.310219	0.619
OXIDOREDUCTASE_ACTIVITY_ACTING_ON_THE_CH_CH_GROUP_OF_DONORS	23	0.605167	1.76177	0.0019685	0.289312	0.699
OXIDOREDUCTASE_ACTIVITY_ACTING_ON_CH_OH_GROUP_OF_DONORS	60	0.474028	1.71539	0	0.373081	0.854
STEROID_BIOSYNTHETIC_PROCESS	22	0.576025	1.66491	0.00804829	0.509658	0.957
NEGATIVE_REGULATION_OF_TRANSPORT	17	0.616691	1.6593	0.00744879	0.461845	0.965
POTASSIUM_ION_TRANSPORT	49	0.477888	1.63908	0.0040568	0.485023	0.98
VOLTAGE_GATED_POTASSIUM_CHANNEL_COMPLEX	37	0.496969	1.61279	0.0205339	0.54969	0.996
OXIDOREDUCTASE_ACTIVITY_GO_0016705	31	0.515104	1.60809	0.0163599	0.515771	0.997
REGULATION_OF_SECRETION	33	0.509671	1.60616	0.00590551	0.477154	0.997
ATPASE_ACTIVITY_COUPLED_TO_TRANSMEMBRANE_MOVEMENT_OF_IONS_PHOSPHORYLATIVE_MECHANISM	18	0.577441	1.59806	0.0195312	0.471348	0.997
ION_HOMEOSTASIS	112	0.392219	1.58546	0.00398406	0.48894	0.999
PROTEIN_PROCESSING	48	0.455723	1.58441	0.0121457	0.458538	0.999
NEUROPEPTIDE_RECEPTOR_ACTIVITY	15	0.598752	1.58274	0.0314342	0.433164	0.999
CELLULAR_CATION_HOMEOSTASIS	93	0.401226	1.57817	0.0038835	0.42337	0.999
OXYGEN_BINDING	19	0.56688	1.57508	0.0294118	0.407499	0.999
NEUROPEPTIDE_BINDING	15	0.598752	1.5655	0.00976562	0.416407	1
CARBOHYDRATE_TRANSPORT	16	0.584025	1.55348	0.0329218	0.433708	1
RESPONSE_TO_NUTRIENT_LEVELS	28	0.521743	1.55023	0.0251451	0.423338	1
SIGNAL_SEQUENCE_BINDING	15	0.594084	1.54993	0.0474308	0.404005	1
CARBOHYDRATE_TRANSMEMBRANE_TRANSPORTER_ACTIVITY	15	0.596399	1.53875	0.0365385	0.421239	1
VOLTAGE_GATED_POTASSIUM_CHANNEL_ACTIVITY	33	0.485275	1.53534	0.0194553	0.414076	1
	Mentioned in the Text
	Also of interest

## Sheet: KEGG_Dup15_Neurons
DOWN
NAME	SIZE	ES	NES	NOM p-val	FDR q-val	FWER p-val
KEGG_NITROGEN_METABOLISM	21	-0.61952	-1.85286	0.0021692	0.0419069	0.05
KEGG_DORSO_VENTRAL_AXIS_FORMATION	23	-0.535353	-1.59623	0.0204082	0.318295	0.535
KEGG_COLORECTAL_CANCER	61	-0.408465	-1.51076	0.0175055	0.436434	0.796
KEGG_GLYCEROPHOSPHOLIPID_METABOLISM	68	-0.382466	-1.46011	0.0203252	0.482456	0.911
KEGG_O_GLYCAN_BIOSYNTHESIS	26	-0.442912	-1.37687	0.0755102	0.702906	0.995
KEGG_ALANINE_ASPARTATE_AND_GLUTAMATE_METABOLISM	30	-0.414237	-1.34667	0.0905263	0.725194	0.998
KEGG_PROSTATE_CANCER	86	-0.327403	-1.31839	0.0516129	0.749533	1
KEGG_GLYCOSYLPHOSPHATIDYLINOSITOL_GPI_ANCHOR_BIOSYNTHESIS	24	-0.426348	-1.29875	0.12848	0.738614	1
KEGG_RENAL_CELL_CARCINOMA	68	-0.333696	-1.27617	0.0847826	0.752362	1
KEGG_RNA_DEGRADATION	55	-0.339925	-1.2471	0.107759	0.804329	1
KEGG_MTOR_SIGNALING_PATHWAY	51	-0.338235	-1.22417	0.1606	0.836616	1
KEGG_PROGESTERONE_MEDIATED_OOCYTE_MATURATION	82	-0.307321	-1.21278	0.150106	0.816809	1
KEGG_LYSINE_DEGRADATION	43	-0.353568	-1.21188	0.165591	0.757375	1
KEGG_CALCIUM_SIGNALING_PATHWAY	158	-0.276178	-1.20184	0.0936819	0.744985	1
KEGG_AMINOACYL_TRNA_BIOSYNTHESIS	40	-0.343949	-1.17568	0.220202	0.804249	1
KEGG_AMYOTROPHIC_LATERAL_SCLEROSIS_ALS	46	-0.318775	-1.13646	0.225207	0.930851	1
KEGG_OOCYTE_MEIOSIS	104	-0.276629	-1.13501	0.189796	0.882525	1
KEGG_PEROXISOME	75	-0.294009	-1.12916	0.252119	0.85887	1
KEGG_CELL_ADHESION_MOLECULES_CAMS	108	-0.270975	-1.12569	0.213656	0.828504	1
KEGG_NATURAL_KILLER_CELL_MEDIATED_CYTOTOXICITY	96	-0.278422	-1.12412	0.213187	0.792677	1
UP
NAME	SIZE	ES	NES	NOM p-val	FDR q-val	FWER p-val
KEGG_RIBOSOME	86	0.625104	2.42552	0	0	0
KEGG_NOD_LIKE_RECEPTOR_SIGNALING_PATHWAY	59	0.531662	1.93529	0	0.00627027	0.011
KEGG_OXIDATIVE_PHOSPHORYLATION	109	0.459125	1.84219	0	0.024338	0.06
KEGG_PARKINSONS_DISEASE	108	0.448254	1.80211	0	0.0307298	0.099
KEGG_FRUCTOSE_AND_MANNOSE_METABOLISM	32	0.534067	1.72267	0.00380952	0.0599433	0.224
KEGG_BUTANOATE_METABOLISM	33	0.527609	1.68309	0.0094697	0.0743923	0.319
KEGG_CYTOSOLIC_DNA_SENSING_PATHWAY	43	0.448927	1.52307	0.0248092	0.272284	0.803
KEGG_GRAFT_VERSUS_HOST_DISEASE	18	0.540673	1.5114	0.0394477	0.262097	0.835
KEGG_STEROID_BIOSYNTHESIS	17	0.538978	1.51046	0.0534351	0.23531	0.838
KEGG_GLYCOLYSIS_GLUCONEOGENESIS	56	0.415558	1.50706	0.0154143	0.218016	0.846
KEGG_CYTOKINE_CYTOKINE_RECEPTOR_INTERACTION	197	0.345702	1.50289	0.0017762	0.204957	0.857
KEGG_HUNTINGTONS_DISEASE	164	0.353306	1.50026	0.00170068	0.192958	0.868
KEGG_AMINO_SUGAR_AND_NUCLEOTIDE_SUGAR_METABOLISM	42	0.438172	1.49545	0.0310219	0.184182	0.873
KEGG_GALACTOSE_METABOLISM	24	0.494009	1.4931	0.0318091	0.175098	0.877
KEGG_METABOLISM_OF_XENOBIOTICS_BY_CYTOCHROME_P450	50	0.40932	1.45324	0.0323741	0.225996	0.95
KEGG_BLADDER_CANCER	41	0.425571	1.43992	0.0432331	0.232955	0.961
KEGG_VALINE_LEUCINE_AND_ISOLEUCINE_DEGRADATION	44	0.413455	1.43748	0.035514	0.222748	0.962
KEGG_FATTY_ACID_METABOLISM	41	0.423732	1.42456	0.040367	0.233093	0.976
KEGG_TYROSINE_METABOLISM	34	0.439311	1.42404	0.0532319	0.222098	0.976
KEGG_ALZHEIMERS_DISEASE	147	0.330424	1.40014	0.0109489	0.252178	0.985
KEGG_P53_SIGNALING_PATHWAY	64	0.376508	1.39249	0.0369004	0.254407	0.988
KEGG_COMPLEMENT_AND_COAGULATION_CASCADES	57	0.382986	1.38464	0.0475285	0.255843	0.991
KEGG_GAP_JUNCTION	83	0.359407	1.37089	0.0257353	0.26963	0.995
KEGG_PRIMARY_IMMUNODEFICIENCY	24	0.448651	1.35796	0.0733945	0.282433	0.998
KEGG_STEROID_HORMONE_BIOSYNTHESIS	34	0.417902	1.35353	0.0891473	0.278864	0.998
KEGG_LYSOSOME	116	0.317046	1.28857	0.0719178	0.410918	1
KEGG_CHEMOKINE_SIGNALING_PATHWAY	164	0.300745	1.28014	0.037234	0.417906	1
	Mentioned in the Text

## Sheet: KEGG_AS_Neurons
DOWN
NAME	SIZE	ES	NES	NOM p-val	FDR q-val	FWER p-val
KEGG_LONG_TERM_DEPRESSION	62	-0.461934	-1.69451	0	0.406089	0.284
KEGG_ALZHEIMERS_DISEASE	145	-0.3698	-1.5451	0.0021322	0.826664	0.747
KEGG_DRUG_METABOLISM_OTHER_ENZYMES	38	-0.468026	-1.53831	0.0228216	0.583282	0.764
KEGG_SMALL_CELL_LUNG_CANCER	83	-0.396	-1.50475	0.0087146	0.577127	0.856
KEGG_CALCIUM_SIGNALING_PATHWAY	159	-0.352322	-1.46866	0.0143443	0.606671	0.922
KEGG_LYSINE_DEGRADATION	44	-0.426406	-1.44462	0.0258964	0.607433	0.953
KEGG_PARKINSONS_DISEASE	108	-0.357089	-1.42457	0.0102669	0.602301	0.973
KEGG_PRION_DISEASES	31	-0.452873	-1.42364	0.0674603	0.530444	0.973
KEGG_VASCULAR_SMOOTH_MUSCLE_CONTRACTION	102	-0.359567	-1.41701	0.0120724	0.494265	0.978
KEGG_MELANOGENESIS	92	-0.357425	-1.3979	0.0306748	0.507147	0.985
KEGG_ALANINE_ASPARTATE_AND_GLUTAMATE_METABOLISM	30	-0.446688	-1.39617	0.0748988	0.467705	0.986
KEGG_ECM_RECEPTOR_INTERACTION	79	-0.365923	-1.38913	0.0315126	0.452217	0.987
KEGG_SELENOAMINO_ACID_METABOLISM	24	-0.467397	-1.37359	0.0803383	0.468728	0.99
KEGG_LONG_TERM_POTENTIATION	62	-0.372696	-1.35869	0.049904	0.483354	0.993
KEGG_GLIOMA	62	-0.372528	-1.35793	0.0491453	0.45303	0.993
KEGG_AMYOTROPHIC_LATERAL_SCLEROSIS_ALS	46	-0.392426	-1.35037	0.063786	0.448345	0.995
KEGG_PANTOTHENATE_AND_COA_BIOSYNTHESIS	15	-0.510072	-1.34334	0.146091	0.442902	0.997
KEGG_SPHINGOLIPID_METABOLISM	35	-0.417455	-1.34214	0.0969697	0.421204	0.997
KEGG_RENIN_ANGIOTENSIN_SYSTEM	15	-0.495434	-1.33779	0.111954	0.410438	0.998
KEGG_NOTCH_SIGNALING_PATHWAY	43	-0.398247	-1.33495	0.0724346	0.39751	0.998
KEGG_VIBRIO_CHOLERAE_INFECTION	53	-0.376169	-1.31502	0.10241	0.43083	1
UP
NAME	SIZE	ES	NES	NOM p-val	FDR q-val	FWER p-val
KEGG_STEROID_BIOSYNTHESIS	17	0.794283	2.15454	0	0.000791	0.001
KEGG_FRUCTOSE_AND_MANNOSE_METABOLISM	33	0.601105	1.88362	0.00192308	0.0138932	0.037
KEGG_STEROID_HORMONE_BIOSYNTHESIS	40	0.548474	1.82759	0	0.0182051	0.071
KEGG_TERPENOID_BACKBONE_BIOSYNTHESIS	15	0.651644	1.72616	0.0114504	0.045104	0.21
KEGG_PENTOSE_PHOSPHATE_PATHWAY	25	0.577213	1.68397	0.0113852	0.0555975	0.301
KEGG_GLYCOLYSIS_GLUCONEOGENESIS	58	0.459554	1.64021	0.00393701	0.0731139	0.438
KEGG_METABOLISM_OF_XENOBIOTICS_BY_CYTOCHROME_P450	57	0.458322	1.60677	0.00401606	0.0870213	0.559
KEGG_RNA_POLYMERASE	29	0.511467	1.585	0.00578035	0.0940773	0.637
KEGG_BASAL_TRANSCRIPTION_FACTORS	33	0.483958	1.52663	0.0342857	0.137687	0.802
KEGG_BIOSYNTHESIS_OF_UNSATURATED_FATTY_ACIDS	22	0.469713	1.37349	0.0994264	0.391636	0.997
KEGG_RIBOSOME	86	0.354126	1.37268	0.0368217	0.358128	0.997
KEGG_ALDOSTERONE_REGULATED_SODIUM_REABSORPTION	37	0.418426	1.36686	0.0767717	0.342314	0.998
KEGG_PPAR_SIGNALING_PATHWAY	62	0.365542	1.34733	0.0626223	0.361205	0.999
KEGG_GLYCEROLIPID_METABOLISM	47	0.382261	1.31276	0.0696721	0.42008	1
KEGG_AMINO_SUGAR_AND_NUCLEOTIDE_SUGAR_METABOLISM	42	0.380382	1.27259	0.108365	0.503426	1
KEGG_GLYCOSAMINOGLYCAN_DEGRADATION	21	0.408395	1.1981	0.213018	0.731129	1
KEGG_GLYCOSAMINOGLYCAN_BIOSYNTHESIS_CHONDROITIN_SULFATE	20	0.425741	1.18928	0.226766	0.721631	1
KEGG_STARCH_AND_SUCROSE_METABOLISM	40	0.353763	1.18859	0.189583	0.685122	1
KEGG_THYROID_CANCER	28	0.386016	1.18785	0.213592	0.652007	1
KEGG_PROTEASOME	41	0.353768	1.18201	0.202925	0.63991	1
	Mentioned in the Text
	Also of interest

## Sheet: FOXO1_GSEA.txt
NAME	PROBE	GENE SYMBOL	GENE_TITLE	RANK IN GENE LIST	RANK METRIC SCORE	RUNNING ES	CORE ENRICHMENT	SIMONS DB	Relationship	PMID
row_0	TGFB3	TGFB3	transforming growth factor, beta 3	47	3.75448	0.0196661	Yes
row_1	RASD2	RASD2	RASD family, member 2	60	3.57242	0.0402952	Yes
row_2	MMP13	MMP13	matrix metallopeptidase 13 (collagenase 3)	108	3.04162	0.0557046	Yes
row_3	MAPK10	MAPK10	mitogen-activated protein kinase 10	147	2.74782	0.0698868	Yes
row_4	ASTN1	ASTN1	astrotactin 1	159	2.70788	0.0854121	Yes
row_5	DDIT4	DDIT4	DNA-damage-inducible transcript 4	195	2.5926	0.0988432	Yes
row_6	CSRNP3	null	null	198	2.57743	0.114117	Yes
row_7	FGF9	FGF9	fibroblast growth factor 9 (glia-activating factor)	225	2.47227	0.127356	Yes
row_8	FOXO1	null	null	238	2.40351	0.141006	Yes	Yes	Del/Dup of locus Assciated with ASD	11450821; 21658581
row_9	TMEM71	TMEM71	transmembrane protein 71	248	2.37557	0.154664	Yes
row_10	SH3GL3	SH3GL3	SH3-domain GRB2-like 3	278	2.2684	0.16651	Yes
row_11	WNT2B	WNT2B	wingless-type MMTV integration site family, member 2B	285	2.25093	0.1796	Yes
row_12	ZNF711	ZNF711	zinc finger protein 711	322	2.17182	0.19046	Yes
row_13	ROR1	ROR1	receptor tyrosine kinase-like orphan receptor 1	343	2.10004	0.201828	Yes
row_14	MOBP	MOBP	myelin-associated oligodendrocyte basic protein	349	2.09308	0.214034	Yes
row_15	ABCA6	ABCA6	ATP-binding cassette, sub-family A (ABC1), member 6	403	2.00049	0.222875	Yes
row_16	ERG	ERG	v-ets erythroblastosis virus E26 oncogene homolog (avian)	506	1.80398	0.227672	Yes	Yes	Association	22843504
row_17	SEPP1	SEPP1	selenoprotein P, plasma, 1	515	1.79624	0.23793	Yes
row_18	ROGDI	ROGDI	rogdi homolog (Drosophila)	576	1.71706	0.244668	Yes
row_19	NR1D1	NR1D1	nuclear receptor subfamily 1, group D, member 1	583	1.7132	0.254547	Yes
row_20	PCDH18	PCDH18	protocadherin 18	584	1.71125	0.264765	Yes
row_21	BMP2	BMP2	bone morphogenetic protein 2	692	1.58752	0.267977	Yes
row_22	JPH3	JPH3	junctophilin 3	708	1.57182	0.276485	Yes
row_23	LMO4	LMO4	LIM domain only 4	732	1.54179	0.284344	Yes
row_24	SEMA6D	SEMA6D	sema domain, transmembrane domain (TM), and cytoplasmic domain, (semaphorin) 6D	735	1.53899	0.293416	Yes
row_25	STOML3	STOML3	stomatin (EPB72)-like 3	744	1.52742	0.302069	Yes
row_26	MDK	MDK	midkine (neurite growth-promoting factor 2)	763	1.50536	0.310003	Yes
row_27	CDKN1A	CDKN1A	cyclin-dependent kinase inhibitor 1A (p21, Cip1)	836	1.45968	0.314502	Yes
row_28	ITGB8	ITGB8	integrin, beta 8	917	1.39012	0.318117	Yes
row_29	FOXP2	FOXP2	forkhead box P2	970	1.35353	0.323153	Yes	Yes	Mostly language, but also ASD	21572417
row_30	JAG1	JAG1	jagged 1 (Alagille syndrome)	1017	1.31755	0.328326	Yes
row_31	THRA	THRA	thyroid hormone receptor, alpha (erythroblastic leukemia viral (v-erb-a) oncogene homolog, avian)	1062	1.29582	0.333487	Yes	Yes	WGS	25621899
row_32	PROX1	PROX1	prospero-related homeobox 1	1296	1.20022	0.327005	Yes
row_33	TFAP4	TFAP4	transcription factor AP-4 (activating enhancer binding protein 4)	1334	1.17814	0.331873	Yes
row_34	SLC38A3	SLC38A3	solute carrier family 38, member 3	1344	1.17475	0.338361	Yes
row_35	ETV1	ETV1	ets variant gene 1	1360	1.16623	0.344446	Yes
row_36	SQSTM1	SQSTM1	sequestosome 1	1524	1.09902	0.341461	Yes
row_37	MEIS2	MEIS2	Meis1, myeloid ecotropic viral integration site 1 homolog 2 (mouse)	1535	1.09382	0.347407	Yes
row_38	SNCAIP	SNCAIP	synuclein, alpha interacting protein (synphilin)	1776	0.999703	0.339318	Yes
row_39	HR	HR	hairless homolog (mouse)	1795	0.993266	0.344195	Yes
row_40	NTN1	NTN1	netrin 1	1797	0.99209	0.35006	Yes
row_41	PTCH1	PTCH1	patched homolog 1 (Drosophila)	1972	0.917986	0.34535	Yes
row_42	PITPNC1	PITPNC1	phosphatidylinositol transfer protein, cytoplasmic 1	2037	0.897353	0.346959	Yes
row_43	NRG1	NRG1	neuregulin 1	2040	0.896018	0.352193	Yes	Yes	Mice	19643092
row_44	RORA	RORA	RAR-related orphan receptor A	2042	0.89526	0.35748	Yes	Yes	Decreased Expression Human Brain	20375269
row_45	EN2	EN2	engrailed homolog 2	2064	0.892656	0.36158	Yes	Yes	Association
row_46	DLL1	DLL1	delta-like 1 (Drosophila)	2073	0.892656	0.366442	Yes
row_47	RASD1	RASD1	RAS, dexamethasone-induced 1	2096	0.889231	0.370463	Yes	Yes	SMS mouse - weak	23703963
row_48	EPHB2	EPHB2	EPH receptor B2	2119	0.880934	0.374435	Yes	Yes	de novo ASD genes	22495306
row_49	IRX4	IRX4	iroquois homeobox protein 4	2192	0.865411	0.375385	Yes
row_50	CNNM3	CNNM3	cyclin M3	2290	0.848941	0.374773	No
row_51	FOXG1	null	null	2478	0.805703	0.36863	No
row_52	TBC1D17	TBC1D17	TBC1 domain family, member 17	2657	0.767554	0.362787	No
row_53	TSC22D3	TSC22D3	TSC22 domain family, member 3	2825	0.726323	0.357342	No
row_54	FOSL2	FOSL2	FOS-like antigen 2	2876	0.715058	0.358683	No
row_55	TEK	TEK	TEK tyrosine kinase, endothelial (venous malformations, multiple cutaneous and mucosal)	2958	0.697197	0.358102	No
row_56	POU2F1	POU2F1	POU domain, class 2, transcription factor 1	3006	0.68394	0.359432	No
row_57	HNF1A	null	null	3047	0.677176	0.361133	No
row_58	C12orf50	C12ORF50	chromosome 12 open reading frame 50	3077	0.669757	0.363434	No
row_59	KLF9	KLF9	Kruppel-like factor 9	3187	0.643141	0.360889	No
row_60	HOXA1	HOXA1	homeobox A1	3232	0.635799	0.362109	No
row_61	MDGA1	MDGA1	MAM domain containing glycosylphosphatidylinositol anchor 1	3316	0.625914	0.360984	No
row_62	MBTPS1	MBTPS1	membrane-bound transcription factor peptidase, site 1	3392	0.612635	0.36025	No
row_63	ST5	ST5	suppression of tumorigenicity 5	3480	0.594157	0.358701	No
row_64	PHF21A	PHF21A	PHD finger protein 21A	3500	0.591731	0.361122	No
row_65	SLC25A39	SLC25A39	solute carrier family 25, member 39	3809	0.550116	0.346365	No
row_66	DTNA	DTNA	dystrobrevin, alpha	3902	0.534548	0.344168	No
row_67	TET2	null	null	3939	0.528148	0.345214	No
row_68	ULK1	ULK1	unc-51-like kinase 1 (C. elegans)	3994	0.51885	0.345149	No
row_69	THBS3	THBS3	thrombospondin 3	4193	0.487406	0.336461	No
row_70	DIXDC1	DIXDC1	DIX domain containing 1	4266	0.476999	0.335092	No
row_71	HOXA11	HOXA11	homeobox A11	4366	0.464053	0.332064	No
row_72	CLC	CLC	Charcot-Leyden crystal protein	4380	0.464053	0.334074	No
row_73	KRT85	KRT85	keratin 85	4420	0.464053	0.33456	No
row_74	HOXA10	HOXA10	homeobox A10	4582	0.464053	0.327901	No
row_75	NFIB	NFIB	nuclear factor I/B	4627	0.459585	0.328068	No
row_76	DHRS3	DHRS3	dehydrogenase/reductase (SDR family) member 3	4650	0.455137	0.329497	No
row_77	MTX1	MTX1	metaxin 1	4777	0.438163	0.324733	No
row_78	MLLT6	MLLT6	myeloid/lymphoid or mixed-lineage leukemia (trithorax homolog, Drosophila); translocated to, 6	4824	0.42898	0.3246	No
row_79	CEP95	null	null	4923	0.413989	0.321331	No
row_80	TSSK2	TSSK2	testis-specific serine kinase 2	4980	0.40382	0.320462	No
row_81	NDRG1	NDRG1	N-myc downstream regulated gene 1	5131	0.379913	0.313945	No
row_82	ARID4A	ARID4A	AT rich interactive domain 4A (RBP1-like)	5213	0.371196	0.311417	No
row_83	HSH2D	HSH2D	hematopoietic SH2 domain containing	5224	0.370627	0.313044	No
row_84	CDKN1C	CDKN1C	cyclin-dependent kinase inhibitor 1C (p57, Kip2)	5373	0.353207	0.306484	No
row_85	PLAG1	PLAG1	pleiomorphic adenoma gene 1	5558	0.3471	0.297779	No
row_86	TSPAN13	TSPAN13	tetraspanin 13	5613	0.339135	0.296641	No
row_87	PURA	PURA	purine-rich element binding protein A	5650	0.335026	0.296532	No
row_88	H3F3A	H3F3A	H3 histone, family 3A	5663	0.33269	0.297816	No
row_89	NUB1	NUB1	negative regulator of ubiquitin-like proteins 1	5688	0.330816	0.298386	No
row_90	TBX4	TBX4	T-box 4	5704	0.329303	0.299474	No
row_91	NDUFA5	NDUFA5	NADH dehydrogenase (ubiquinone) 1 alpha subcomplex, 5, 13kDa	5744	0.325146	0.299131	No
row_92	CLSTN1	CLSTN1	calsyntenin 1	5763	0.322646	0.300003	No
row_93	TCF7	TCF7	transcription factor 7 (T-cell specific, HMG-box)	5809	0.317557	0.299263	No
row_94	PHOX2B	PHOX2B	paired-like homeobox 2b	5824	0.317549	0.300339	No
row_95	GRAP2	GRAP2	GRB2-related adaptor protein 2	6403	0.256765	0.268016	No
row_96	SATB2	SATB2	SATB family member 2	6436	0.252443	0.267649	No
row_97	SIN3A	SIN3A	SIN3 homolog A, transcription regulator (yeast)	6443	0.251689	0.2688	No
row_98	LEMD1	LEMD1	LEM domain containing 1	6575	0.241753	0.262571	No
row_99	HBP1	HBP1	HMG-box transcription factor 1	6663	0.233855	0.258871	No
row_100	AKT1S1	AKT1S1	AKT1 substrate 1 (proline-rich)	6686	0.23062	0.258959	No
row_101	AKT2	AKT2	v-akt murine thymoma viral oncogene homolog 2	6711	0.228024	0.258915	No
row_102	SLC10A7	null	null	6726	0.226251	0.259446	No
row_103	KDM6A	null	null	7092	0.184431	0.239167	No
row_104	SMAD5	SMAD5	SMAD, mothers against DPP homolog 5 (Drosophila)	7124	0.181141	0.238433	No
row_105	EIF4EBP2	EIF4EBP2	eukaryotic translation initiation factor 4E binding protein 2	7297	0.163414	0.229334	No
row_106	GCNT2	GCNT2	glucosaminyl (N-acetyl) transferase 2, I-branching enzyme (I blood group)	7322	0.160328	0.228886	No
row_107	SERINC3	SERINC3	serine incorporator 3	7505	0.146926	0.219102	No
row_108	C1orf43	C1ORF43	chromosome 1 open reading frame 43	7554	0.141772	0.217137	No
row_109	IL6ST	IL6ST	interleukin 6 signal transducer (gp130, oncostatin M receptor)	7581	0.139056	0.216445	No
row_110	TRERF1	TRERF1	transcriptional regulating factor 1	7590	0.138076	0.2168	No
row_111	HNRNPA0	null	null	7636	0.132595	0.214956	No
row_112	SIAH3	null	null	7713	0.127532	0.211266	No
row_113	NFIX	NFIX	nuclear factor I/X (CCAAT-binding transcription factor)	7723	0.126847	0.211496	No
row_114	RSF1	RSF1	remodeling and spacing factor 1	7831	0.116053	0.205922	No
row_115	YTHDC1	YTHDC1	YTH domain containing 1	7978	0.100002	0.197967	No
row_116	CHD2	CHD2	chromodomain helicase DNA binding protein 2	8037	0.0944517	0.195134	No
row_117	FGF10	FGF10	fibroblast growth factor 10	8243	0.0752352	0.183575	No
row_118	FOXN3	null	null	8358	0.0654889	0.177288	No
row_119	CLPX	CLPX	ClpX caseinolytic peptidase X homolog (E. coli)	8384	0.062976	0.1762	No
row_120	PSEN1	PSEN1	presenilin 1 (Alzheimer disease 3)	8654	0.0408284	0.160687	No
row_121	PITX2	PITX2	paired-like homeodomain transcription factor 2	8741	0.0344553	0.155855	No
row_122	XPO7	XPO7	exportin 7	8864	0.0230857	0.148847	No
row_123	CREBL2	CREBL2	cAMP responsive element binding protein-like 2	8966	0.0114377	0.142999	No
row_124	MRGPRF	MRGPRF	MAS-related GPR, member F	8977	0.0105053	0.142476	No
row_125	PTMS	PTMS	parathymosin	8994	0.00778252	0.141585	No
row_126	CSNK1G3	CSNK1G3	casein kinase 1, gamma 3	9037	0.00438602	0.139151	No
row_127	LIFR	LIFR	leukemia inhibitory factor receptor alpha	9117	-0.00679348	0.134564	No
row_128	TXNDC12	TXNDC12	thioredoxin domain containing 12 (endoplasmic reticulum)	9123	-0.00759077	0.134317	No
row_129	RBM39	RBM39	RNA binding motif protein 39	9167	-0.0105683	0.131861	No
row_130	ART3	ART3	ADP-ribosyltransferase 3	9196	-0.0138978	0.130304	No
row_131	CHCHD7	CHCHD7	coiled-coil-helix-coiled-coil-helix domain containing 7	9236	-0.016556	0.128119	No
row_132	HLX	null	null	9264	-0.0204686	0.126659	No
row_133	LAMC2	LAMC2	laminin, gamma 2	9313	-0.0256081	0.124001	No
row_134	DDX5	DDX5	DEAD (Asp-Glu-Ala-Asp) box polypeptide 5	9489	-0.0432359	0.114008	No
row_135	CLIP2	null	null	9752	-0.072813	0.099096	No
row_136	STK35	STK35	serine/threonine kinase 35	9775	-0.0742632	0.0982508	No
row_137	ETV5	ETV5	ets variant gene 5 (ets-related molecule)	9833	-0.0777218	0.0953761	No
row_138	PIK3C2A	PIK3C2A	phosphoinositide-3-kinase, class 2, alpha polypeptide	9842	-0.0797187	0.0953835	No
row_139	STX6	STX6	syntaxin 6	9862	-0.082369	0.0947624	No
row_140	SLU7	SLU7	-	9999	-0.0973291	0.0873774	No
row_141	STX16	STX16	syntaxin 16	10034	-0.10274	0.0859993	No
row_142	CCDC89	CCDC89	coiled-coil domain containing 89	10137	-0.112348	0.0806955	No
row_143	LIX1L	LIX1L	Lix1 homolog (mouse) like	10298	-0.128604	0.0720913	No
row_144	SREK1	null	null	10413	-0.140755	0.0662542	No
row_145	TRIM8	TRIM8	tripartite motif-containing 8	10576	-0.155981	0.0576964	No
row_146	GNAO1	GNAO1	guanine nucleotide binding protein (G protein), alpha activating activity polypeptide O	10673	-0.16625	0.0530659	No
row_147	PAK1	PAK1	p21/Cdc42/Rac1-activated kinase 1 (STE20 homolog, yeast)	10684	-0.167757	0.0534819	No
row_148	TCF15	TCF15	transcription factor 15 (basic helix-loop-helix)	10750	-0.168742	0.0506821	No
row_149	C15orf26	C15ORF26	chromosome 15 open reading frame 26	10790	-0.168742	0.0494053	No
row_150	SALL3	SALL3	sal-like 3 (Drosophila)	10934	-0.168742	0.0420366	No
row_151	IKZF4	IKZF4	IKAROS family zinc finger 4 (Eos)	10955	-0.169714	0.0418785	No
row_152	TBL1X	TBL1X	transducin (beta)-like 1X-linked	10969	-0.171096	0.0421387	No
row_153	CD109	CD109	CD109 molecule	11095	-0.182602	0.0359071	No
row_154	GNAS	GNAS	GNAS complex locus	11131	-0.186437	0.0349703	No
row_155	BRD8	BRD8	bromodomain containing 8	11457	-0.223914	0.0172703	No
row_156	SCRN3	SCRN3	secernin 3	11527	-0.230693	0.0146061	No
row_157	HOXA2	HOXA2	homeobox A2	11641	-0.240162	0.00942119	No
row_158	TBCC	TBCC	tubulin-specific chaperone c	11863	-0.254979	-0.00200143	No
row_159	TRIM63	TRIM63	tripartite motif-containing 63	11992	-0.26515	-0.00791579	No
row_160	ZMAT4	ZMAT4	zinc finger, matrin type 4	12004	-0.26515	-0.00697682	No
row_161	WBP2NL	WBP2NL	WBP2 N-terminal like	12388	-0.298849	-0.0276267	No
row_162	OTUD7B	OTUD7B	OTU domain containing 7B	12455	-0.306314	-0.0296636	No
row_163	PELI2	PELI2	pellino homolog 2 (Drosophila)	12547	-0.318206	-0.0330938	No
row_164	NKX2-2	NKX2-2	NK2 transcription factor related, locus 2 (Drosophila)	12563	-0.318394	-0.0320712	No
row_165	GRB7	GRB7	growth factor receptor-bound protein 7	12565	-0.318394	-0.0302286	No
row_166	PPM1B	PPM1B	protein phosphatase 1B (formerly 2C), magnesium-dependent, beta isoform	12917	-0.357911	-0.0486514	No
row_167	PTS	PTS	6-pyruvoyltetrahydropterin synthase	12934	-0.359859	-0.0474397	No
row_168	KCNA1	KCNA1	potassium voltage-gated channel, shaker-related subfamily, member 1 (episodic ataxia with myokymia)	12965	-0.364102	-0.0470228	No
row_169	PI4K2A	null	null	13056	-0.37484	-0.0500563	No
row_170	ZADH2	ZADH2	zinc binding alcohol dehydrogenase, domain containing 2	13077	-0.377426	-0.0489741	No
row_171	SRSF1	null	null	13161	-0.389674	-0.051509	No
row_172	PDGFA	PDGFA	platelet-derived growth factor alpha polypeptide	13186	-0.392538	-0.0505709	No
row_173	DNAJB12	DNAJB12	DnaJ (Hsp40) homolog, subfamily B, member 12	13377	-0.419396	-0.0591959	No
row_174	FSTL1	FSTL1	follistatin-like 1	13450	-0.428552	-0.0608543	No
row_175	C1QTNF3	C1QTNF3	C1q and tumor necrosis factor related protein 3	13516	-0.438417	-0.0620438	No
row_176	HEBP2	HEBP2	heme binding protein 2	13538	-0.439441	-0.0606498	No
row_177	DDX46	DDX46	DEAD (Asp-Glu-Ala-Asp) box polypeptide 46	13560	-0.442362	-0.0592384	No
row_178	TNRC6A	TNRC6A	trinucleotide repeat containing 6A	13767	-0.472215	-0.0684852	No
row_179	EZH1	EZH1	enhancer of zeste homolog 1 (Drosophila)	13792	-0.475708	-0.0670504	No
row_180	GFI1B	GFI1B	growth factor independent 1B (potential regulator of CDKN1A, translocated in CML)	13891	-0.483788	-0.069902	No
row_181	OSBPL5	OSBPL5	oxysterol binding protein-like 5	13976	-0.492538	-0.0718812	No
row_182	IL1RAPL1	IL1RAPL1	interleukin 1 receptor accessory protein-like 1	14240	-0.527996	-0.0841337	No
row_183	CIR1	null	null	14367	-0.551023	-0.0882239	No
row_184	RAD21	RAD21	RAD21 homolog (S. pombe)	14387	-0.554608	-0.0860251	No
row_185	HOXB8	HOXB8	homeobox B8	14471	-0.571724	-0.0874729	No
row_186	EIF4G1	EIF4G1	eukaryotic translation initiation factor 4 gamma, 1	14496	-0.572583	-0.0854596	No
row_187	ASXL1	ASXL1	additional sex combs like 1 (Drosophila)	14537	-0.580641	-0.0843355	No
row_188	TMPRSS15	null	null	14662	-0.609019	-0.0879622	No
row_189	MAP4K5	MAP4K5	mitogen-activated protein kinase kinase kinase kinase 5	14824	-0.640097	-0.0935706	No
row_190	VSIG2	VSIG2	V-set and immunoglobulin domain containing 2	14884	-0.656908	-0.0931039	No
row_191	UTY	UTY	ubiquitously transcribed tetratricopeptide repeat gene, Y-linked	14931	-0.661045	-0.0918511	No
row_192	NEDD4	NEDD4	neural precursor cell expressed, developmentally down-regulated 4	14976	-0.671453	-0.090419	No
row_193	NR2F1	NR2F1	nuclear receptor subfamily 2, group F, member 1	15138	-0.708481	-0.095619	No
row_194	INSIG1	INSIG1	insulin induced gene 1	15226	-0.73227	-0.0963425	No
row_195	ANKRD28	ANKRD28	ankyrin repeat domain 28	15272	-0.743578	-0.0945383	No
row_196	CAMK2G	CAMK2G	calcium/calmodulin-dependent protein kinase (CaM kinase) II gamma	15407	-0.775575	-0.0977562	No
row_197	KCNJ16	KCNJ16	potassium inwardly-rectifying channel, subfamily J, member 16	15443	-0.786743	-0.0951084	No
row_198	MITF	MITF	microphthalmia-associated transcription factor	15568	-0.824291	-0.0974497	No
row_199	TSHZ3	TSHZ3	teashirt family zinc finger 3	15735	-0.876413	-0.10194	No
row_200	NAA15	null	null	15765	-0.890774	-0.0983195	No
row_201	SERTAD4	SERTAD4	SERTA domain containing 4	15800	-0.910245	-0.0948757	No
row_202	DBNDD2	DBNDD2	dysbindin (dystrobrevin binding protein 1) domain containing 2	15976	-0.9855	-0.0992416	No
row_203	PNPLA2	PNPLA2	patatin-like phospholipase domain containing 2	16079	-1.03777	-0.0990195	No
row_204	KLF12	KLF12	Kruppel-like factor 12	16116	-1.05425	-0.0948329	No
row_205	LHX9	LHX9	LIM homeobox 9	16131	-1.06216	-0.0893105	No
row_206	PRDM1	PRDM1	PR domain containing 1, with ZNF domain	16236	-1.12373	-0.0886922	No
row_207	LIMK2	LIMK2	LIM domain kinase 2	16260	-1.13945	-0.0832354	No
row_208	EML1	EML1	echinoderm microtubule associated protein like 1	16309	-1.17364	-0.0790389	No
row_209	SH2D4A	SH2D4A	SH2 domain containing 4A	16358	-1.20109	-0.0746784	No
row_210	CFL2	CFL2	cofilin 2 (muscle)	16408	-1.25205	-0.0700722	No
row_211	CACNA2D1	CACNA2D1	calcium channel, voltage-dependent, alpha 2/delta subunit 1	16608	-1.41868	-0.0732573	No
row_212	MAFF	MAFF	v-maf musculoaponeurotic fibrosarcoma oncogene homolog F (avian)	16615	-1.42622	-0.0650924	No
row_213	CADM1	null	null	16828	-1.7126	-0.0672839	No
row_214	PIK3IP1	null	null	16830	-1.71628	-0.0570941	No
row_215	EHD1	EHD1	EH-domain containing 1	16951	-1.97791	-0.0523124	No
row_216	FRY	FRY	furry homolog (Drosophila)	17023	-2.19068	-0.0433901	No
row_217	SH3RF1	SH3RF1	SH3 domain containing ring finger 1	17030	-2.2205	-0.0304822	No
row_218	ID2	ID2	inhibitor of DNA binding 2, dominant negative helix-loop-helix protein	17058	-2.3307	-0.0181464	No
row_219	KIF20A	KIF20A	kinesin family member 20A	17284	-5.31469	0.000409832	No

## Sheet: ASD Brain vs Dup15 Neurons
	Background REFLIST (12608)	Dup15 Up Overlap (212)	Dup15 Up Overlap (expected)	Dup15 Up Overlap (over/under)	Dup15 Up Overlap (fold Enrichment)	Dup15 Up Overlap (P-value)	ASD Up Overlap (75)	ASD Up Overlap (expected)	ASD Up Overlap (over/under)	ASD Up Overlap (fold Enrichment)	ASD Up Overlap (P-value)
PANTHER GO-Slim Molecular Function
structural constituent of ribosome (GO:0003735)	149	23	2.51	+	> 5	3.2e-13	2	0.89	+	2.26	1
structural molecule activity (GO:0005198)	681	32	11.45	+	2.79	2.66e-05	7	4.05	+	1.73	1
Unclassified (UNCLASSIFIED)	5528	85	92.95	-	0.91	0	26	32.88	-	0.79	0
PANTHER GO-Slim Biological Process
translation (GO:0006412)	355	23	5.97	+	3.85	9.98e-06	2	2.11	-	0.95	1
Unclassified (UNCLASSIFIED)	4555	61	76.59	-	0.8	0	19	27.1	-	0.7	0
GO cellular component complete
cytosolic large ribosomal subunit (GO:0022625)	50	18	0.84	+	> 5	1.71e-15	1	0.3	+	3.36	1
cytosolic ribosome (GO:0022626)	88	29	1.48	+	> 5	4.12e-25	2	0.52	+	3.82	1
cytosolic small ribosomal subunit (GO:0022627)	34	11	0.57	+	> 5	2.71e-08	1	0.2	+	4.94	1
large ribosomal subunit (GO:0015934)	80	19	1.35	+	> 5	3.39e-13	1	0.48	+	2.1	1
ribosomal subunit (GO:0044391)	132	30	2.22	+	> 5	1.82e-21	2	0.79	+	2.55	1
small ribosomal subunit (GO:0015935)	52	11	0.87	+	> 5	2.23e-06	1	0.31	+	3.23	1
cytosolic part (GO:0044445)	163	30	2.74	+	> 5	6.59e-19	2	0.97	+	2.06	1
ribosome (GO:0005840)	181	30	3.04	+	> 5	1.18e-17	2	1.08	+	1.86	1
cell-substrate adherens junction (GO:0005924)	354	26	5.95	+	4.37	4.71e-07	6	2.11	+	2.85	1
cell-substrate junction (GO:0030055)	357	26	6	+	4.33	5.61e-07	6	2.12	+	2.83	1
focal adhesion (GO:0005925)	351	25	5.9	+	4.24	1.93e-06	6	2.09	+	2.87	1
adherens junction (GO:0005912)	421	29	7.08	+	4.1	1.86e-07	8	2.5	+	3.19	1
anchoring junction (GO:0070161)	433	29	7.28	+	3.98	3.53e-07	8	2.58	+	3.11	1
ribonucleoprotein complex (GO:0030529)	572	34	9.62	+	3.54	2.02e-07	2	3.4	-	0.59	1
cell junction (GO:0030054)	912	37	15.34	+	2.41	0.000631	10	5.43	+	1.84	1
extracellular exosome (GO:0070062)	1966	67	33.06	+	2.03	5.11e-06	23	11.69	+	1.97	0.857
extracellular membrane-bounded organelle (GO:0065010)	1966	67	33.06	+	2.03	5.11e-06	23	11.69	+	1.97	0.857
extracellular organelle (GO:0043230)	1978	67	33.26	+	2.01	6.56e-06	23	11.77	+	1.95	0.933
extracellular vesicle (GO:1903561)	1978	67	33.26	+	2.01	6.56e-06	23	11.77	+	1.95	0.933
cell surface (GO:0009986)	450	15	7.57	+	1.98	1	12	2.68	+	4.48	0.0149
cytosol (GO:0005829)	2530	83	42.54	+	1.95	1.53e-07	24	15.05	+	1.59	1
membrane-bounded vesicle (GO:0031988)	2494	77	41.94	+	1.84	1.76e-05	27	14.84	+	1.82	0.854
vesicle (GO:0031982)	2579	78	43.37	+	1.8	3.36e-05	27	15.34	+	1.76	1
extracellular region part (GO:0044421)	2460	74	41.36	+	1.79	0.000119	27	14.63	+	1.85	0.685
extracellular region (GO:0005576)	2726	77	45.84	+	1.68	0.000789	31	16.22	+	1.91	0.104
cytoplasmic part (GO:0044444)	5927	141	99.66	+	1.41	8.89e-06	49	35.26	+	1.39	1
plasma membrane (GO:0005886)	2928	69	49.23	+	1.4	1	34	17.42	+	1.95	0.0227
cell periphery (GO:0071944)	2996	69	50.38	+	1.37	1	34	17.82	+	1.91	0.0377
cytoplasm (GO:0005737)	7750	165	130.31	+	1.27	0.000301	59	46.1	+	1.28	1
Unclassified (UNCLASSIFIED)	1033	9	17.37	-	0.52	0	1	6.14	-	< 0.2	0
GO molecular function complete
structural constituent of ribosome (GO:0003735)	130	29	2.19	+	> 5	3.45e-20	2	0.77	+	2.59	1
structural molecule activity (GO:0005198)	415	33	6.98	+	4.73	3.53e-10	4	2.47	+	1.62	1
poly(A) RNA binding (GO:0044822)	1010	36	16.98	+	2.12	0.0306	7	6.01	+	1.17	1
RNA binding (GO:0003723)	1320	47	22.2	+	2.12	0.00115	7	7.85	-	0.89	1
Unclassified (UNCLASSIFIED)	1516	10	25.49	-	0.39	0	1	9.02	-	< 0.2	0
GO biological process complete
positive regulation of tumor necrosis factor biosynthetic process (GO:0042535)	6	3	0.1	+	> 5	1	3	0.04	+	> 5	0.0465
SRP-dependent cotranslational protein targeting to membrane (GO:0006614)	99	32	1.66	+	> 5	6.47e-27	2	0.59	+	3.4	1
cotranslational protein targeting to membrane (GO:0006613)	100	32	1.68	+	> 5	8.8e-27	2	0.59	+	3.36	1
protein targeting to ER (GO:0045047)	102	32	1.72	+	> 5	1.61e-26	2	0.61	+	3.3	1
establishment of protein localization to endoplasmic reticulum (GO:0072599)	106	32	1.78	+	> 5	5.22e-26	2	0.63	+	3.17	1
viral transcription (GO:0019083)	101	29	1.7	+	> 5	1.12e-22	2	0.6	+	3.33	1
nuclear-transcribed mRNA catabolic process, nonsense-mediated decay (GO:0000184)	106	29	1.78	+	> 5	4.25e-22	2	0.63	+	3.17	1
protein localization to endoplasmic reticulum (GO:0070972)	121	33	2.03	+	> 5	1.54e-25	2	0.72	+	2.78	1
viral gene expression (GO:0019080)	111	29	1.87	+	> 5	1.51e-21	2	0.66	+	3.03	1
multi-organism metabolic process (GO:0044033)	117	29	1.97	+	> 5	6.38e-21	2	0.7	+	2.87	1
translational termination (GO:0006415)	145	30	2.44	+	> 5	1.53e-19	2	0.86	+	2.32	1
protein targeting to membrane (GO:0006612)	164	32	2.76	+	> 5	2.7e-20	2	0.98	+	2.05	1
nuclear-transcribed mRNA catabolic process (GO:0000956)	161	30	2.71	+	> 5	2.82e-18	2	0.96	+	2.09	1
translational elongation (GO:0006414)	168	31	2.82	+	> 5	7.25e-19	2	1	+	2	1
cellular protein complex disassembly (GO:0043624)	165	30	2.77	+	> 5	5.57e-18	2	0.98	+	2.04	1
mRNA catabolic process (GO:0006402)	172	30	2.89	+	> 5	1.76e-17	2	1.02	+	1.95	1
protein complex disassembly (GO:0043241)	181	30	3.04	+	> 5	7.14e-17	2	1.08	+	1.86	1
macromolecular complex disassembly (GO:0032984)	190	30	3.19	+	> 5	2.7e-16	2	1.13	+	1.77	1
RNA catabolic process (GO:0006401)	191	30	3.21	+	> 5	3.11e-16	2	1.14	+	1.76	1
translational initiation (GO:0006413)	195	30	3.28	+	> 5	5.48e-16	2	1.16	+	1.72	1
viral life cycle (GO:0019058)	202	31	3.4	+	> 5	1.36e-16	2	1.2	+	1.66	1
establishment of protein localization to membrane (GO:0090150)	234	33	3.93	+	> 5	9.05e-17	3	1.39	+	2.16	1
establishment of protein localization to organelle (GO:0072594)	302	33	5.08	+	> 5	1.58e-13	3	1.8	+	1.67	1
nucleobase-containing compound catabolic process (GO:0034655)	287	31	4.83	+	> 5	2.19e-12	2	1.71	+	1.17	1
protein localization to membrane (GO:0072657)	325	34	5.46	+	> 5	1.79e-13	3	1.93	+	1.55	1
aromatic compound catabolic process (GO:0019439)	316	33	5.31	+	> 5	5.79e-13	3	1.88	+	1.6	1
heterocycle catabolic process (GO:0046700)	307	32	5.16	+	> 5	1.87e-12	2	1.83	+	1.1	1
cellular nitrogen compound catabolic process (GO:0044270)	310	32	5.21	+	> 5	2.45e-12	2	1.84	+	1.08	1
translation (GO:0006412)	335	34	5.63	+	> 5	4.35e-13	2	1.99	+	1	1
positive regulation of chemotaxis (GO:0050921)	69	7	1.16	+	> 5	1	6	0.41	+	> 5	0.0256
organic cyclic compound catabolic process (GO:1901361)	329	33	5.53	+	> 5	1.83e-12	3	1.96	+	1.53	1
positive regulation of behavior (GO:0048520)	80	8	1.35	+	> 5	0.485	7	0.48	+	> 5	0.00369
peptide biosynthetic process (GO:0043043)	352	34	5.92	+	> 5	1.85e-12	2	2.09	-	0.96	1
protein targeting (GO:0006605)	362	33	6.09	+	> 5	2.69e-11	3	2.15	+	1.39	1
peptide metabolic process (GO:0006518)	409	37	6.88	+	> 5	5.99e-13	4	2.43	+	1.64	1
activation of MAPK activity (GO:0000187)	114	10	1.92	+	> 5	0.186	7	0.68	+	> 5	0.0375
amide biosynthetic process (GO:0043604)	398	34	6.69	+	> 5	6.3e-11	2	2.37	-	0.84	1
protein localization to organelle (GO:0033365)	456	38	7.67	+	4.96	3e-12	3	2.71	+	1.11	1
regulation of chemotaxis (GO:0050920)	98	8	1.65	+	4.85	1	7	0.58	+	> 5	0.014
cellular component disassembly (GO:0022411)	398	31	6.69	+	4.63	1.14e-08	3	2.37	+	1.27	1
regulation of behavior (GO:0050795)	131	10	2.2	+	4.54	0.585	9	0.78	+	> 5	0.000626
cellular amide metabolic process (GO:0043603)	527	39	8.86	+	4.4	5.27e-11	4	3.13	+	1.28	1
positive regulation of cytokine production (GO:0001819)	234	16	3.93	+	4.07	0.0187	9	1.39	+	> 5	0.0712
mRNA metabolic process (GO:0016071)	488	31	8.21	+	3.78	1.76e-06	2	2.9	-	0.69	1
interspecies interaction between organisms (GO:0044419)	605	38	10.17	+	3.74	1.74e-08	8	3.6	+	2.22	1
symbiosis, encompassing mutualism through parasitism (GO:0044403)	605	38	10.17	+	3.74	1.74e-08	8	3.6	+	2.22	1
cytoplasmic transport (GO:0016482)	606	38	10.19	+	3.73	1.83e-08	7	3.6	+	1.94	1
leukocyte migration (GO:0050900)	144	9	2.42	+	3.72	1	8	0.86	+	> 5	0.0162
viral process (GO:0016032)	562	35	9.45	+	3.7	1.81e-07	5	3.34	+	1.5	1
multi-organism cellular process (GO:0044764)	565	35	9.5	+	3.68	2.09e-07	5	3.36	+	1.49	1
single-organism membrane organization (GO:0044802)	598	37	10.06	+	3.68	5.43e-08	5	3.56	+	1.41	1
intracellular protein transport (GO:0006886)	619	38	10.41	+	3.65	3.41e-08	5	3.68	+	1.36	1
cellular macromolecule catabolic process (GO:0044265)	643	38	10.81	+	3.51	1.03e-07	5	3.82	+	1.31	1
membrane organization (GO:0061024)	732	42	12.31	+	3.41	1.86e-08	8	4.35	+	1.84	1
single-organism cellular localization (GO:1902580)	700	40	11.77	+	3.4	7.64e-08	6	4.16	+	1.44	1
regulation of cytokine production (GO:0001817)	363	20	6.1	+	3.28	0.0275	10	2.16	+	4.63	0.384
macromolecule catabolic process (GO:0009057)	741	40	12.46	+	3.21	4.2e-07	6	4.41	+	1.36	1
positive regulation of cellular component movement (GO:0051272)	259	13	4.36	+	2.99	1	12	1.54	+	> 5	0.000291
positive regulation of locomotion (GO:0040017)	264	13	4.44	+	2.93	1	11	1.57	+	> 5	0.00317
positive regulation of cell migration (GO:0030335)	244	12	4.1	+	2.92	1	11	1.45	+	> 5	0.00146
organonitrogen compound biosynthetic process (GO:1901566)	795	39	13.37	+	2.92	1.14e-05	6	4.73	+	1.27	1
cellular protein localization (GO:0034613)	962	46	16.18	+	2.84	6.59e-07	7	5.72	+	1.22	1
positive regulation of cell motility (GO:2000147)	251	12	4.22	+	2.84	1	11	1.49	+	> 5	0.00193
cellular macromolecule localization (GO:0070727)	967	46	16.26	+	2.83	7.81e-07	7	5.75	+	1.22	1
inflammatory response (GO:0006954)	241	11	4.05	+	2.71	1	10	1.43	+	> 5	0.0114
single-organism intracellular transport (GO:1902582)	994	45	16.71	+	2.69	6.21e-06	10	5.91	+	1.69	1
protein transport (GO:0015031)	1025	46	17.24	+	2.67	5.1e-06	10	6.1	+	1.64	1
organic substance catabolic process (GO:1901575)	1159	52	19.49	+	2.67	2.92e-07	8	6.89	+	1.16	1
cellular catabolic process (GO:0044248)	1137	50	19.12	+	2.62	1.54e-06	7	6.76	+	1.03	1
establishment of protein localization (GO:0045184)	1096	48	18.43	+	2.6	4.44e-06	11	6.52	+	1.69	1
protein complex subunit organization (GO:0071822)	1099	47	18.48	+	2.54	1.5e-05	12	6.54	+	1.84	1
multi-organism process (GO:0051704)	1423	60	23.93	+	2.51	7.33e-08	17	8.46	+	2.01	1
organonitrogen compound metabolic process (GO:1901564)	1287	54	21.64	+	2.5	1.33e-06	10	7.66	+	1.31	1
intracellular transport (GO:0046907)	1139	47	19.15	+	2.45	4.62e-05	10	6.78	+	1.48	1
catabolic process (GO:0009056)	1344	54	22.6	+	2.39	6.36e-06	8	7.99	+	1	1
protein localization (GO:0008104)	1409	55	23.69	+	2.32	1.2e-05	12	8.38	+	1.43	1
establishment of localization in cell (GO:0051649)	1458	55	24.52	+	2.24	4.03e-05	14	8.67	+	1.61	1
regulation of response to external stimulus (GO:0032101)	586	22	9.85	+	2.23	1	15	3.49	+	4.3	0.0107
organic substance transport (GO:0071702)	1475	55	24.8	+	2.22	6.05e-05	16	8.77	+	1.82	1
response to oxygen-containing compound (GO:1901700)	1026	38	17.25	+	2.2	0.0231	19	6.1	+	3.11	0.0427
response to endogenous stimulus (GO:0009719)	1106	40	18.6	+	2.15	0.0217	18	6.58	+	2.74	0.44
positive regulation of multicellular organismal process (GO:0051240)	926	33	15.57	+	2.12	0.24	18	5.51	+	3.27	0.0408
cellular localization (GO:0051641)	1752	62	29.46	+	2.1	3.6e-05	15	10.42	+	1.44	1
macromolecule localization (GO:0033036)	1639	58	27.56	+	2.1	0.000137	13	9.75	+	1.33	1
defense response (GO:0006952)	935	32	15.72	+	2.04	0.678	18	5.56	+	3.24	0.0467
single-organism transport (GO:0044765)	2275	75	38.25	+	1.96	9.96e-06	25	13.53	+	1.85	1
positive regulation of response to stimulus (GO:0048584)	1433	46	24.1	+	1.91	0.0814	26	8.52	+	3.05	0.000649
single-organism localization (GO:1902578)	2418	76	40.66	+	1.87	6.33e-05	26	14.38	+	1.81	1
establishment of localization (GO:0051234)	2851	88	47.94	+	1.84	4.43e-06	30	16.96	+	1.77	1
positive regulation of signal transduction (GO:0009967)	1007	31	16.93	+	1.83	1	19	5.99	+	3.17	0.0326
transport (GO:0006810)	2765	84	46.49	+	1.81	3.2e-05	29	16.45	+	1.76	1
response to organic substance (GO:0010033)	1860	56	31.28	+	1.79	0.0479	28	11.06	+	2.53	0.00839
positive regulation of cell communication (GO:0010647)	1199	36	20.16	+	1.79	1	21	7.13	+	2.94	0.0291
cellular response to chemical stimulus (GO:0070887)	1687	50	28.37	+	1.76	0.263	26	10.04	+	2.59	0.0156
localization (GO:0051179)	3435	98	57.76	+	1.7	1.83e-05	33	20.43	+	1.61	1
response to stress (GO:0006950)	2588	65	43.52	+	1.49	1	34	15.39	+	2.21	0.00788
positive regulation of cellular process (GO:0048522)	3294	77	55.39	+	1.39	1	38	19.59	+	1.94	0.0323
response to stimulus (GO:0050896)	4975	113	83.65	+	1.35	0.205	51	29.59	+	1.72	0.00356
single-organism cellular process (GO:0044763)	7730	162	129.98	+	1.25	0.0144	60	45.98	+	1.3	1
Unclassified (UNCLASSIFIED)	1581	18	26.58	-	0.68	0	4	9.4	-	0.43	0
PANTHER Protein Class
ribosomal protein (PC00202)	185	27	3.11	+	> 5	4.64e-15	2	1.1	+	1.82	1
RNA binding protein (PC00031)	691	33	11.62	+	2.84	1.36e-05	4	4.11	-	0.97	1
Unclassified (UNCLASSIFIED)	5264	72	88.51	-	0.81	0	24	31.31	-	0.77	0

## Sheet: qRT-PCR Primers
Gene	Forward Primer	Reverse Primer	Probe
ERG	ccagtcgaaagctgctcaa	gttggtccaagaatctgataagg	12
FOXP2	ctatggccatggagtttgc	tgcgtgttcattgttaaggtg	64
THRA	ggctgtgctgctaatgtcaa	tgactcttctcgatcttgtcca	40
RORA	tccctactgttcgttcacca	caggtttccagatgcgattt	60
EN2	catggcacagggcttgta	tactcgctgtccgacttgc	22
EPHB2	tgtctcagatgatgatggagga	ccgcatcacctggatactgt	49
FOXO1	aagggtgacagcaacagctc	ttccttcattctgcacacga	11
FOXP4	ccaggatgttcgcctatttc	ttgtgcaggctgaggttgt	87
PAX3	aaacaccgtgccgtcagt	gctgtgtttggccttcttct	6
SFRP4	gcctgaagccatcgtcac	ccatcatgtctggtgtgatgt	88
For NRG1 Variants
NRG1 GGF2	aacctcaagaaggaggtcagc	ccgaaggactagtttggaacc	72
NRG1 SMDF	gcaactcagccacaaacaac	cccagtggtggatgtagatgt	68
NRG1 HRG-gamma's, NRG1 HRG-alpha, NRG1 HRG-beta2, NRG1 HRG-beta3s	aaagggaagggcaagaagaa	ggcttttcatctctttcaatcg	71
NRG1 ndf43, NRG1 HRG-beta1's	tgtcacccagactcctagcc	acgattacagagtggctttcg	78
Control primers
GAPDH	agccacatcgctcagacac	gcccaatacgaccaaatcc	60
